# Supplementary material for: Metagenomics Reveals Microbial Diversity and Metabolic Potentials of Seawater and Surface Sediment From a Hadal Biosphere at the Yap Trench
Source: PubMed Central journal article supplement (PMC6194347; doi:10.3389/fmicb.2018.02402), 2018-10-12
Supplement: Data_Sheet_1.pdf [file Data_Sheet_1.pdf]

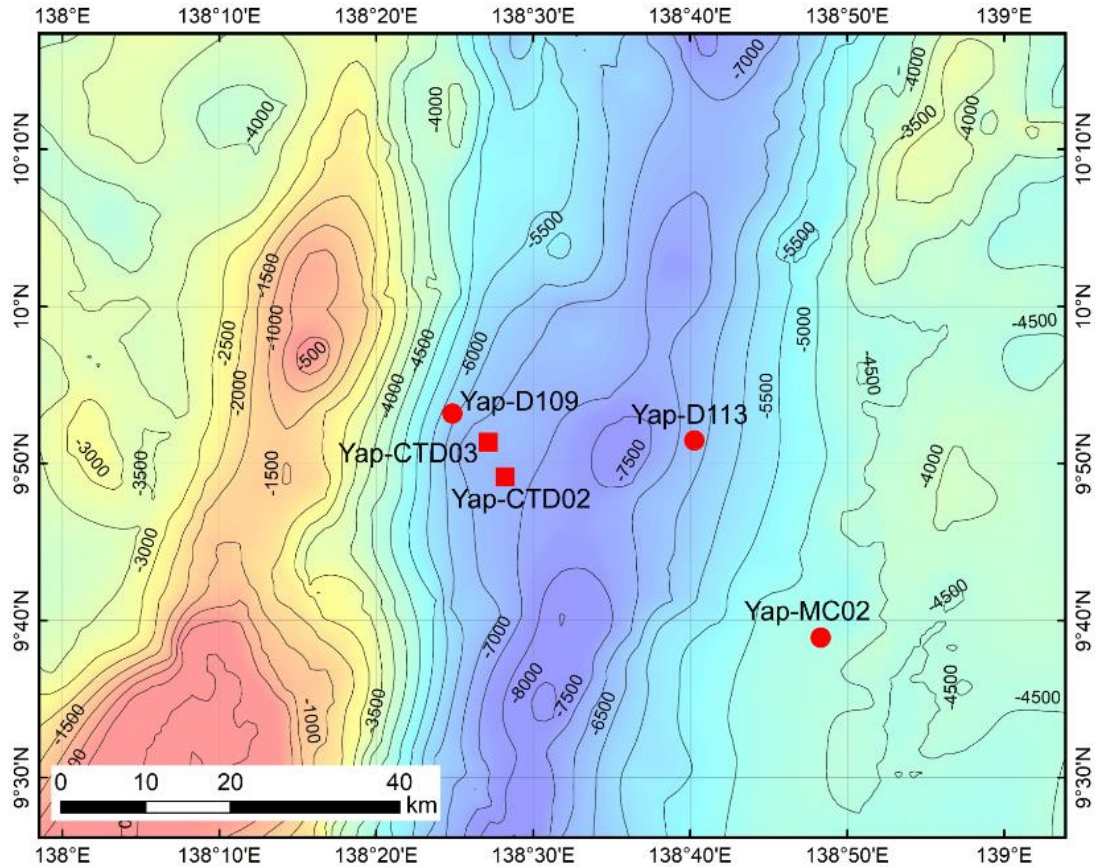

**Figure S1. Sampling location of the Yap Trench.** The red solid circles are sediment collection sites, and the red squares are seawater collection sites.

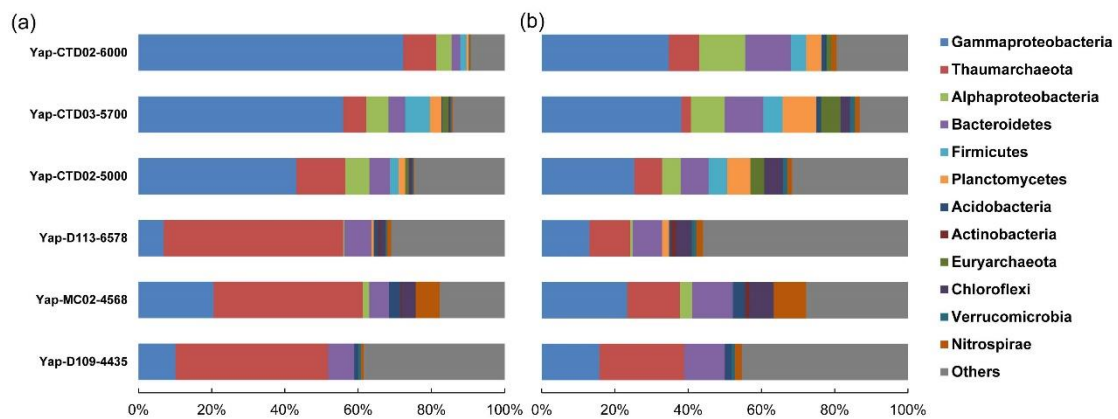

**Figure S2. (a) Relative abundance and (b) diversity of the genomic bins identified in the 6 metagenomes of the Yap Trench.** Abundance indicates the number of reads that mapped to a genomic bin, which normalized to the length of the genes and total number of reads in metagenome. Diversity indicates the number of genomic bins in each taxon.

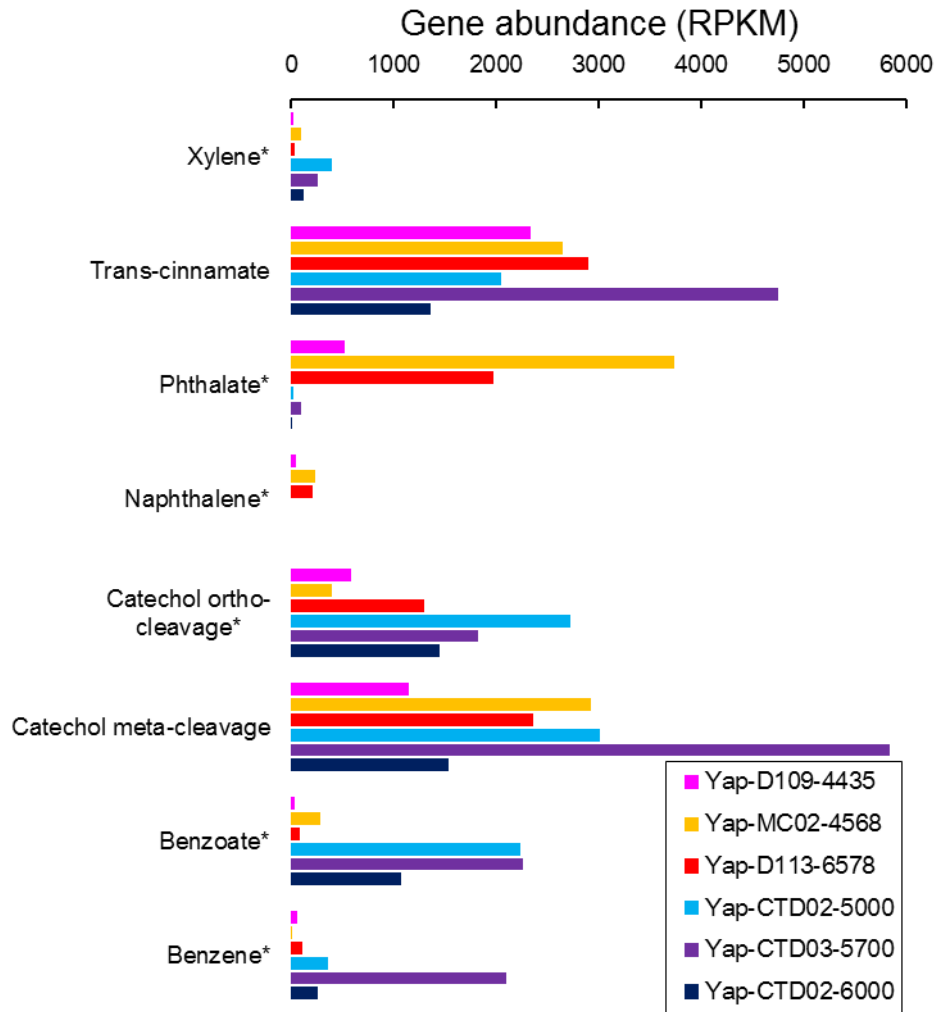

**Figure S3. The abundance of genes involved in various aromatics degradation pathways in the 6 metagenomes of the Yap Trench.** The asterisks indicate statistical significant between the 3 sediment and the 3 seawater metagenomes ( $P < 0.05$ ).

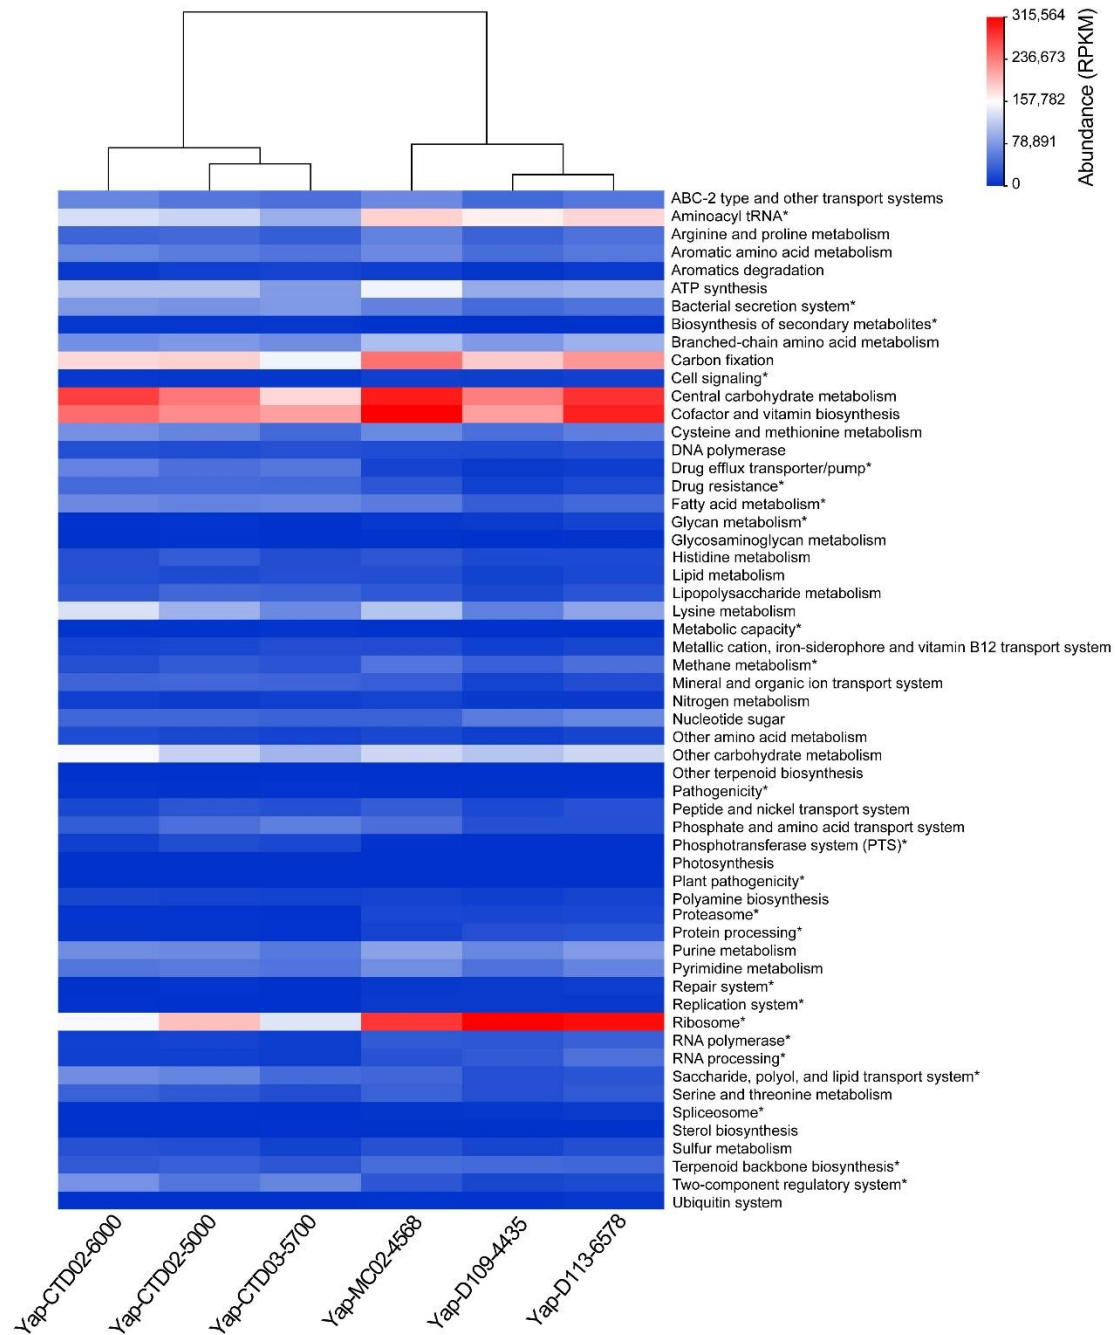

**Figure S4. Heatmap showing the gene abundances involved in various metabolic pathways in the 6 metagenomes of the Yap Trench (according to KEGG category).** The hierarchical cluster dendrogram is based on Bray-Curtis distance matrix. The asterisks indicate statistical significant between the 3 sediment and the 3 seawater metagenomes ( $P < 0.05$ ).

**Table S1. Relative abundance of the microbial groups in each sample for generating Figures 1a and 1b.**

| Sample        | Gammapr<br>oteobacte<br>ria | Thauma<br>rchaota | Alphaprote<br>obacteria | Bacter<br>oidetes | Deferrib<br>acteres | Firmi<br>cutes | Deltaprote<br>obacteria | Plancto<br>mycetes | Acidob<br>acteria | Actinob<br>acteria | Euryar<br>chaota | Gemmati<br>monadetes | Chlor<br>oflexi | Betaprote<br>obacteria | Verrucom<br>icrobia | Nitros<br>pirae | Epsilonpr<br>oteobacte<br>ria | Chlam<br>ydiae | Thermus-<br>Deinococ<br>cus | Crenar<br>charot<br>a | Othe<br>rs |
|---------------|-----------------------------|-------------------|-------------------------|-------------------|---------------------|----------------|-------------------------|--------------------|-------------------|--------------------|------------------|----------------------|-----------------|------------------------|---------------------|-----------------|-------------------------------|----------------|-----------------------------|-----------------------|------------|
| Yap-109-4435  | 0.106                       | 0.601             | 0.027                   | 0.034             | 0.000               | 0.034          | 0.057                   | 0.010              | 0.006             | 0.016              | 0.034            | 0.000                | 0.006           | 0.009                  | 0.004               | 0.004           | 0.004                         | 0.017          | 0.003                       | 0.001                 | 0.006      |
| Yap-M02-4568  | 0.248                       | 0.319             | 0.091                   | 0.031             | 0.000               | 0.054          | 0.071                   | 0.032              | 0.015             | 0.030              | 0.008            | 0.001                | 0.016           | 0.020                  | 0.006               | 0.015           | 0.003                         | 0.011          | 0.004                       | 0.000                 | 0.007      |
| Yap-113-6578  | 0.152                       | 0.531             | 0.033                   | 0.022             | 0.000               | 0.046          | 0.058                   | 0.016              | 0.012             | 0.019              | 0.031            | 0.000                | 0.012           | 0.012                  | 0.003               | 0.005           | 0.004                         | 0.008          | 0.005                       | 0.001                 | 0.008      |
| Yap-5000      | 0.792                       | 0.014             | 0.018                   | 0.017             | 0.000               | 0.139          | 0.006                   | 0.003              | 0.001             | 0.003              | 0.004            | 0.000                | 0.001           | 0.001                  | 0.002               | 0.001           | 0.000                         | 0.000          | 0.000                       | 0.000                 | 0.001      |
| Yap-5700      | 0.812                       | 0.005             | 0.049                   | 0.007             | 0.000               | 0.106          | 0.004                   | 0.004              | 0.001             | 0.002              | 0.004            | 0.000                | 0.002           | 0.001                  | 0.002               | 0.001           | 0.000                         | 0.000          | 0.001                       | 0.000                 | 0.001      |
| Yap-6000      | 0.922                       | 0.008             | 0.011                   | 0.005             | 0.000               | 0.046          | 0.002                   | 0.001              | 0.000             | 0.001              | 0.001            | 0.000                | 0.001           | 0.001                  | 0.000               | 0.000           | 0.000                         | 0.000          | 0.000                       | 0.000                 | 0.001      |
| PRT-6000      | 0.196                       | 0.000             | 0.405                   | 0.038             | 0.076               | 0.002          | 0.046                   | 0.032              | 0.019             | 0.013              | 0.033            | 0.011                | 0.031           | 0.023                  | 0.022               | 0.000           | 0.000                         | 0.002          | 0.000                       | 0.012                 | 0.015      |
| MVD-4908      | 0.967                       | 0.000             | 0.007                   | 0.000             | 0.000               | 0.000          | 0.000                   | 0.000              | 0.000             | 0.000              | 0.000            | 0.000                | 0.000           | 0.005                  | 0.003               | 0.000           | 0.000                         | 0.000          | 0.000                       | 0.000                 | 0.018      |
| Mariana-5000  | 0.055                       | 0.663             | 0.067                   | 0.002             | 0.069               | 0.000          | 0.027                   | 0.042              | 0.008             | 0.007              | 0.001            | 0.015                | 0.031           | 0.000                  | 0.003               | 0.002           | 0.000                         | 0.000          | 0.000                       | 0.000                 | 0.007      |
| Mariana-6000  | 0.057                       | 0.467             | 0.062                   | 0.182             | 0.066               | 0.000          | 0.012                   | 0.088              | 0.009             | 0.005              | 0.001            | 0.030                | 0.004           | 0.003                  | 0.001               | 0.002           | 0.000                         | 0.000          | 0.000                       | 0.000                 | 0.010      |
| Mariana-7000  | 0.040                       | 0.200             | 0.138                   | 0.221             | 0.198               | 0.000          | 0.021                   | 0.113              | 0.009             | 0.001              | 0.001            | 0.026                | 0.007           | 0.004                  | 0.001               | 0.007           | 0.000                         | 0.000          | 0.000                       | 0.000                 | 0.014      |
| Mariana-7998  | 0.017                       | 0.294             | 0.076                   | 0.245             | 0.221               | 0.000          | 0.008                   | 0.103              | 0.002             | 0.001              | 0.001            | 0.014                | 0.006           | 0.002                  | 0.000               | 0.003           | 0.000                         | 0.000          | 0.000                       | 0.000                 | 0.007      |
| Mariana-9000  | 0.216                       | 0.260             | 0.066                   | 0.126             | 0.190               | 0.000          | 0.011                   | 0.071              | 0.007             | 0.001              | 0.001            | 0.028                | 0.003           | 0.003                  | 0.000               | 0.002           | 0.000                         | 0.000          | 0.000                       | 0.000                 | 0.015      |
| Mariana-10257 | 0.628                       | 0.098             | 0.040                   | 0.066             | 0.085               | 0.000          | 0.009                   | 0.046              | 0.005             | 0.001              | 0.001            | 0.009                | 0.004           | 0.001                  | 0.000               | 0.002           | 0.000                         | 0.000          | 0.000                       | 0.000                 | 0.006      |
| Japan-4989    | 0.165                       | 0.308             | 0.033                   | 0.077             | 0.033               | 0.000          | 0.121                   | 0.066              | 0.044             | 0.022              | 0.022            | 0.022                | 0.022           | 0.000                  | 0.011               | 0.011           | 0.000                         | 0.000          | 0.000                       | 0.000                 | 0.044      |
| Japan-5487    | 0.110                       | 0.220             | 0.195                   | 0.171             | 0.110               | 0.000          | 0.049                   | 0.073              | 0.000             | 0.000              | 0.037            | 0.012                | 0.012           | 0.000                  | 0.000               | 0.000           | 0.000                         | 0.000          | 0.000                       | 0.000                 | 0.012      |
| Japan-5988    | 0.108                       | 0.301             | 0.097                   | 0.140             | 0.065               | 0.000          | 0.065                   | 0.097              | 0.032             | 0.000              | 0.032            | 0.032                | 0.022           | 0.000                  | 0.000               | 0.000           | 0.000                         | 0.000          | 0.000                       | 0.000                 | 0.011      |
| Japan-6486    | 0.188                       | 0.141             | 0.188                   | 0.129             | 0.106               | 0.000          | 0.071                   | 0.047              | 0.012             | 0.000              | 0.012            | 0.024                | 0.012           | 0.000                  | 0.000               | 0.000           | 0.012                         | 0.000          | 0.000                       | 0.000                 | 0.059      |
| Japan-6986    | 0.177                       | 0.165             | 0.153                   | 0.165             | 0.071               | 0.000          | 0.082                   | 0.094              | 0.024             | 0.012              | 0.012            | 0.012                | 0.012           | 0.000                  | 0.012               | 0.000           | 0.000                         | 0.000          | 0.000                       | 0.000                 | 0.012      |
| Japan-7407    | 0.223                       | 0.188             | 0.107                   | 0.205             | 0.045               | 0.000          | 0.036                   | 0.089              | 0.009             | 0.000              | 0.027            | 0.009                | 0.027           | 0.000                  | 0.000               | 0.000           | 0.018                         | 0.000          | 0.000                       | 0.000                 | 0.018      |

The code in R for the NMDS plot is “library("vegan")----otu <- read.table("input.txt", header=T)----row.names(otu) <- otu[,1]--otu <- otu[, -1]----nmds <- metaMDS(otu, distance = "bray", k=2, trymax=20)----plot(nmds, display="sites", choices=c(1, 2), type="t")”.

**Table S2. Detailed information of the gene abundances involved in the microbial degradation pathways of carbohydrates, hydrocarbons, and aromatics as shown in Figures 1c, 1d, and S3.**

| Pathway                            | Gene description                                                                 | Gene abundance (RPKM) |               |               |                |                |                |
|------------------------------------|----------------------------------------------------------------------------------|-----------------------|---------------|---------------|----------------|----------------|----------------|
|                                    |                                                                                  | Yap-D109-4435         | Yap-MC02-4568 | Yap-D113-6578 | Yap-CTD02-5000 | Yap-CTD03-5700 | Yap-CTD02-6000 |
| Carbohydrates                      | Auxiliary activities (AAs)                                                       | 3686.7                | 11405.5       | 5591.5        | 12981.7        | 26945.0        | 23440.5        |
|                                    | Carbohydrate-binding modules (CBMs)                                              | 27505.2               | 33444.3       | 34648.6       | 44028.0        | 29500.4        | 55733.5        |
|                                    | Carbohydrate esterases (CEs)                                                     | 20652.8               | 32460.2       | 31431.1       | 47067.6        | 48138.9        | 46150.5        |
|                                    | Cellulosome                                                                      | 1399.6                | 897.3         | 2109.9        | 4237.6         | 2418.4         | 1994.0         |
|                                    | Glycoside hydrolases (GHs)                                                       | 36827.3               | 53156.5       | 48313.8       | 83770.9        | 64469.6        | 76757.9        |
|                                    | Glycosyltransferases (GTs)                                                       | 136291.7              | 94436.7       | 161304.4      | 104708.7       | 81375.6        | 88569.8        |
|                                    | Polysaccharide lyases (PLs)                                                      | 2680.7                | 3972.1        | 5575.1        | 5617.7         | 4223.5         | 12320.0        |
|                                    | Alkane 1-monooxygenase <i>alkB</i>                                               | 43.6                  | 191.8         | 113.3         | 971.6          | 4144.0         | 678.9          |
|                                    | 7 $\alpha$ -hydroxy-3-oxo- $\Delta$ 4-cholenoic acid oxidoreductase <i>baiCD</i> | 18.9                  | 69.2          | 33.8          | 562.2          | 334.9          | 739.6          |
|                                    | Benzoate 1,2-dioxygenase hydroxylase <i>benA</i>                                 | 20.9                  | 126.8         | 98.6          | 1472.2         | 849.7          | 516.3          |
| Hydrocarbons                       | Biphenyl 2,3-dioxygenase <i>bph</i>                                              | 68.9                  | 478.8         | 338.9         | 251.6          | 491.4          | 189.2          |
|                                    | Choloylglycine hydrolase <i>bsh</i>                                              | 0.0                   | 0.0           | 6.9           | 696.8          | 192.8          | 208.2          |
|                                    | Carbazole 1,9a-dioxygenase <i>carA</i>                                           | 283.9                 | 805.4         | 833.5         | 768.3          | 374.1          | 215.7          |
|                                    | Carnitine monooxygenase <i>cntA</i>                                              | 44.3                  | 397.0         | 134.0         | 1007.4         | 450.2          | 377.2          |
|                                    | Choline trimethylamine-lyase <i>cutC</i>                                         | 10.6                  | 0.0           | 0.0           | 302.3          | 340.8          | 232.8          |
|                                    | Dibenzofuran dioxygenase <i>dxnA/dbfA1</i>                                       | 9.4                   | 160.0         | 107.9         | 19.6           | 59.1           | 10.1           |
|                                    | 2-hydroxypropyl-CoM lyase <i>etnE</i>                                            | 6.5                   | 22.4          | 36.8          | 435.8          | 343.3          | 148.4          |
|                                    | Cytochrome P450                                                                  | 106.6                 | 175.9         | 172.9         | 565.0          | 752.6          | 248.4          |
|                                    | Vinyl chloride reductase <i>vcrA</i>                                             | 10.3                  | 43.2          | 42.9          | 123.9          | 93.5           | 25.6           |
|                                    | Xenobiotic reductase A <i>xenA</i>                                               | 4.6                   | 70.9          | 6.7           | 1654.9         | 346.2          | 3713.3         |
| Xenobiotic reductase B <i>xenB</i> | 105.7                                                                            | 525.1                 | 147.0         | 2648.5        | 4065.8         | 2487.0         |                |

---

|           |                         |        |        |        |        |        |        |
|-----------|-------------------------|--------|--------|--------|--------|--------|--------|
|           | Benzene                 | 61.3   | 8.3    | 106.8  | 365.6  | 2096.2 | 257.6  |
|           | Benzoate                | 35.5   | 293.3  | 82.7   | 2239.2 | 2261.0 | 1076.4 |
|           | Catechol meta-cleavage  | 1151.3 | 2925.2 | 2359.2 | 3019.4 | 5842.2 | 1539.5 |
| Aromatics | Catechol ortho-cleavage | 591.5  | 404.1  | 1300.9 | 2723.6 | 1829.3 | 1446.6 |
|           | Naphthalene             | 54.2   | 242.5  | 211.6  | 0.0    | 0.0    | 0.0    |
|           | Phthalate               | 520.8  | 3738.3 | 1969.9 | 27.6   | 95.1   | 2.7    |
|           | Trans-cinnamate         | 2337.9 | 2652.0 | 2901.5 | 2050.2 | 4750.2 | 1368.8 |
|           | Xylene                  | 21.9   | 104.5  | 36.5   | 398.1  | 265.7  | 125.6  |

---

**Table S3. Detailed information of the gene abundances involved in carbon fixation and nitrogen metabolisms as shown in Figure 2.**

| Pathway      | Gene description                                | Gene abundance (RPKM)         |               |               |                |                |                |        |
|--------------|-------------------------------------------------|-------------------------------|---------------|---------------|----------------|----------------|----------------|--------|
|              |                                                 | Yap-D109-4435                 | Yap-MC02-4568 | Yap-D113-6578 | Yap-CTD02-5000 | Yap-CTD03-5700 | Yap-CTD02-6000 |        |
| HP/HB cycle  | Acetyl-CoA-propionyl-CoA carboxylase            | 3640.6                        | 6083.3        | 6883.4        | 2427.4         | 1572.6         | 1446.4         |        |
|              | Malonyl-CoA reductase (NADPH)                   | 2071.9                        | 1970.5        | 2334.9        | 318.3          | 60.5           | 145.2          |        |
|              | 3-hydroxypropionyl-CoA synthetase (ADP-forming) | 1211.0                        | 2526.9        | 1959.9        | 354.3          | 298.4          | 341.2          |        |
|              | 3-hydroxypropionyl-CoA dehydratase              | 1717.5                        | 3235.0        | 2567.4        | 3293.6         | 3210.7         | 2598.7         |        |
|              | Methylmalonyl-CoA epimerase                     | 1646.1                        | 2229.2        | 1465.2        | 396.8          | 340.6          | 534.3          |        |
|              | Methylmalonyl-CoA mutase                        | 4201.1                        | 5224.8        | 5240.4        | 2297.6         | 1711.0         | 1294.3         |        |
|              | 4-hydroxybutyryl-CoA synthetase (ADP-forming)   | 1249.8                        | 2032.5        | 2786.4        | 417.3          | 305.9          | 497.0          |        |
|              | 4-hydroxybutyryl-CoA dehydratase                | 1087.4                        | 1761.1        | 1118.7        | 748.1          | 1086.9         | 220.5          |        |
|              | 3-hydroxybutyryl-CoA dehydrogenase              | 4725.8                        | 4021.4        | 2768.6        | 892.3          | 1550.7         | 1844.5         |        |
|              | Propanoyl-CoA C-acyltransferase                 | 4519.2                        | 3629.0        | 3810.8        | 554.4          | 1475.6         | 338.6          |        |
|              | Ribulose-bisphosphate carboxylase               | 181.1                         | 560.1         | 256.1         | 128.0          | 40.1           | 25.3           |        |
| Calvin cycle | Phosphoglycerate kinase                         | 5546.4                        | 5500.6        | 6795.4        | 3110.5         | 1968.0         | 3892.8         |        |
|              | Glyceraldehyde-3-phosphate dehydrogenase        | 4103.7                        | 4981.5        | 4950.3        | 4718.3         | 4379.7         | 6888.1         |        |
|              | Fructose-bisphosphate aldolase                  | 897.3                         | 1083.3        | 1043.8        | 4717.8         | 2439.9         | 2682.8         |        |
|              | Fructose-1,6-bisphosphatase                     | 890.3                         | 1431.3        | 1088.5        | 3313.1         | 1245.0         | 2119.7         |        |
|              | Transketolase                                   | 7187.8                        | 6518.4        | 9770.0        | 5211.7         | 2935.6         | 3508.3         |        |
|              | Sedoheptulose-bisphosphatase                    | 36.2                          | 145.7         | 36.2          | 217.3          | 48.2           | 69.7           |        |
|              | Ribose 5-phosphate isomerase                    | 3117.4                        | 5869.7        | 3635.4        | 2928.7         | 1758.5         | 1505.4         |        |
|              | Phosphoribulokinase                             | 170.1                         | 702.4         | 287.8         | 466.8          | 657.4          | 984.1          |        |
|              | Nitrogenase <i>nifH</i>                         | 479.0                         | 272.8         | 133.6         | 29.9           | 240.2          | 63.2           |        |
|              | Ammonification                                  | Nitrite reductase <i>nirB</i> | 1440.9        | 2598.3        | 1400.8         | 5907.3         | 7661.1         | 7625.5 |
|              |                                                 | Nitrite reductase <i>nrfA</i> | 25.9          | 237.1         | 51.0           | 104.0          | 110.2          | 76.8   |

|                           |                                                |        |        |        |        |        |        |
|---------------------------|------------------------------------------------|--------|--------|--------|--------|--------|--------|
|                           | Periplasmic nitrate reductase <i>napA</i>      | 214.8  | 1009.5 | 310.5  | 2403.1 | 2392.3 | 2779.4 |
|                           | Nitrate reductase <i>narG</i>                  | 19.6   | 159.7  | 85.8   | 892.1  | 958.8  | 663.3  |
|                           | Archaeal ammonia monooxygenase A_ <i>amoA</i>  | 515.1  | 555.3  | 421.8  | 86.9   | 98.2   | 117.2  |
|                           | Bacterial ammonia monooxygenase B_ <i>amoA</i> | 28.8   | 0.0    | 27.5   | 0.0    | 5.7    | 0.0    |
|                           | Ammonia monooxygenase <i>amoB</i>              | 468.9  | 1654.6 | 780.3  | 219.1  | 98.2   | 158.8  |
| Nitrification             | Hydroxylamine oxidoreductase <i>hao</i>        | 69.4   | 408.8  | 238.5  | 34.0   | 27.7   | 27.5   |
|                           | Nitrite oxidoreductase <i>nxrA</i>             | 5.6    | 209.9  | 64.5   | 7.7    | 4.0    | 0.0    |
|                           | Nitrite oxidoreductase <i>nxrB</i>             | 12.0   | 246.6  | 84.2   | 354.7  | 543.9  | 258.2  |
|                           | Nitrite oxidoreductase <i>nxrC</i>             | 273.0  | 1741.8 | 730.0  | 826.0  | 555.0  | 158.3  |
|                           | Nitrite reductase <i>nirK</i>                  | 2568.0 | 3941.4 | 3903.1 | 861.8  | 1131.8 | 3389.9 |
|                           | Nitrite reductase <i>nirS</i>                  | 0.0    | 0.0    | 0.0    | 0.0    | 20.3   | 108.2  |
| Denitrification           | Nitric oxide reductase <i>norB</i>             | 292.3  | 823.3  | 216.9  | 1746.1 | 2077.9 | 5130.1 |
|                           | Nitric oxide reductase <i>norC</i>             | 9.4    | 65.0   | 41.2   | 11.5   | 70.9   | 127.6  |
|                           | Nitrous oxide reductase <i>nosZ</i>            | 452.0  | 59.1   | 504.6  | 58.3   | 217.6  | 120.0  |
| Anammox                   | Hydrazine synthase <i>hzsC</i>                 | 0.0    | 0.0    | 23.48  | 0.0    | 0.0    | 0.0    |
|                           | Hydrazine dehydrogenase <i>hdh</i>             | 11.5   | 0.0    | 0.0    | 0.0    | 0.0    | 0.0    |
| Ammonia<br>assimilation   | Glutamine synthetase <i>glnA</i>               | 4772.4 | 9760.2 | 6502.3 | 8920.2 | 6920.8 | 5317.8 |
| Ammonia<br>mineralization | Urease <i>ureC</i>                             | 1712.6 | 2167.2 | 2890.4 | 1181.9 | 711.5  | 688.9  |
|                           | Alanine dehydrogenase <i>ald</i>               | 1405.1 | 2677.2 | 2083.6 | 3840.4 | 3341.2 | 2917.6 |



**Table S4. Detailed information of the gene abundances involved in stress response and metal resistance pathways as shown in Figure 3.**

| Pathway              | Gene description                                                                                                                                                                                                                                                                 | Gene abundance (RPKM) |                       |                       |                        |                        |                        |
|----------------------|----------------------------------------------------------------------------------------------------------------------------------------------------------------------------------------------------------------------------------------------------------------------------------|-----------------------|-----------------------|-----------------------|------------------------|------------------------|------------------------|
|                      |                                                                                                                                                                                                                                                                                  | Yap-<br>D109-<br>4435 | Yap-<br>MC02-<br>4568 | Yap-<br>D113-<br>6578 | Yap-<br>CTD02-<br>5000 | Yap-<br>CTD03-<br>5700 | Yap-<br>CTD02-<br>6000 |
| Alkaline shock       | Alkaline shock protein                                                                                                                                                                                                                                                           | 0.0                   | 0.0                   | 5.0                   | 64.6                   | 19.8                   | 8.7                    |
| Antioxidant enzyme   | Catalase, alkyl hydroperoxide reductase, peroxiredoxin, superoxide dismutase, peroxidase                                                                                                                                                                                         | 4025.9                | 2583.7                | 3893.2                | 5891.5                 | 4917.5                 | 4629.9                 |
| Cold shock           | Cold shock protein cspA/cspB/cspG, Sensor histidine kinase desK, transcriptional regulatory protein DesR                                                                                                                                                                         | 4121.4                | 8068.4                | 4737.9                | 6959.5                 | 7909.0                 | 8799.9                 |
| Envelope stress      | DNA-binding transcriptional regulator baeR/cpxR, sensory transduction histidine kinase, envelope stress induced periplasmic protein, phage shock protein A/B/C, sigma 54-dependent transcriptional activator                                                                     | 5635.4                | 8809.9                | 7197.4                | 17165.3                | 18650.7                | 19163.3                |
| Heat shock           | ATP-dependent Clp protease, chaperones DnaK/GroEL/GrpE/Cpn10, heat shock repressor HrcA, catalase,                                                                                                                                                                               | 9557.1                | 16282.3               | 13634.3               | 17512.8                | 13611.8                | 19046.6                |
| Nitrogen limitation  | Glutamine synthetase, glutamine synthetase repressor, nitrogen regulation protein NtrB/NtrC, transcription regulator TnrA                                                                                                                                                        | 9121.6                | 23321.0               | 14607.8               | 12407.7                | 16396.4                | 14224.5                |
| Osmotic stress       | Sensor protein degS, DNA-binding response regulator DegU/KdpE/MtrA/ompR, sensor histidine kinase MtrB, Osmoregulated proline transporter, Osmoprotection protein proV/proW/proX                                                                                                  | 33692.5               | 64608.2               | 44960.0               | 59776.5                | 64231.6                | 78959.9                |
| Oxidative stress     | Alkyl hydroperoxide reductase, catalase, hydrogen peroxide-inducible genes activator OxyR, peroxide stress regulator PerR, superoxide dismutase, redox-sensitive transcriptional activator SoxR, regulatory protein SoxS                                                         | 12890.1               | 21741.9               | 17433.2               | 21243.5                | 20886.0                | 29650.9                |
| Oxygen limitation    | Aerobic respiration control protein ArcA/ArcB, cytochrome d oxidase cyd subunit I/II, Crp/FNR family transcriptional regulator, nitrate reductase narH/narI/narJ, nitrite-sensitive transcriptional repressor NsrR, transcriptional regulatory protein ResD, sensor protein ResE | 14345.9               | 22989.7               | 19114.4               | 27591.8                | 38809.7                | 56151.8                |
| Phosphate limitation | Alkaline phosphatase, phosphate regulon transcriptional regulatory protein PhoB, phosphate ABC transporter, inner membrane subunit pstA/pstB/pstC/pstS                                                                                                                           | 9539.8                | 15996.2               | 12915.0               | 15240.9                | 18889.2                | 29489.6                |

|                    |                                                                                                                                                                                                                                                                                                                                                                                |        |        |        |        |        |        |
|--------------------|--------------------------------------------------------------------------------------------------------------------------------------------------------------------------------------------------------------------------------------------------------------------------------------------------------------------------------------------------------------------------------|--------|--------|--------|--------|--------|--------|
| Stringent response | GTPase ObgE, (p)ppGpp synthetase SpoT/RelA                                                                                                                                                                                                                                                                                                                                     | 5929.7 | 8718.2 | 7664.5 | 9163.3 | 9031.4 | 8333.1 |
| Al                 | 7-cyano-7-deazaguanine synthase QueC                                                                                                                                                                                                                                                                                                                                           | 0.0    | 0.0    | 0.0    | 61.3   | 54.6   | 0.0    |
| As/Sb              | Thioredoxin-disulfide reductase, arsenical resistance protein ArsH, phosphate ABC transporter, ATP-binding protein pstA/pstB/pstC/pstS, arsenical resistance operon transcriptional repressor ArsD, transcriptional regulator arsR, arsenate reductase (thioredoxin), arsenical-resistance protein, arsenical pump-driving ATPase, arsenical efflux pump membrane protein ArsB | 8.6    | 0.0    | 27.4   | 3143.9 | 2199.6 | 1754.6 |
| Cd                 | Cd(II)/Pb(II)-responsive transcriptional regulator, ychH/yhcN, yodD                                                                                                                                                                                                                                                                                                            | 0.0    | 0.0    | 0.0    | 493.6  | 445.8  | 299.0  |
| Cr                 | Oxygen-insensitive NADPH nitroreductase nfsA, chromate transporter, oscA                                                                                                                                                                                                                                                                                                       | 0.0    | 0.0    | 0.0    | 662.3  | 351.4  | 217.9  |
| Co/Mg              | Magnesium/cobalt transporter CorC, magnesium-translocating P-type ATPase, magnesium/cobalt efflux protein corB/corD                                                                                                                                                                                                                                                            | 0.0    | 0.0    | 0.0    | 886.8  | 895.3  | 484.0  |
| Cu                 | AsnC family transcriptional regulator copR, copper resistance protein CopB, divalent cation tolerance protein CutA, copY/tcrY, comR/ycfQ, dsbC, cutE/Int, bhsA/ycfr/comC, cutC, copF, cutF/nlpE, cueR/ybbI, copZ, csoR                                                                                                                                                         | 167.2  | 303.2  | 94.0   | 2267.8 | 3606.6 | 1651.0 |
| Cu/Ag              | Copper-exporting P-type ATPase CopA, cusR/ylcA, cusC/ylcB, cation efflux system protein CusB, cueA                                                                                                                                                                                                                                                                             | 0.0    | 28.3   | 6.7    | 1244.9 | 951.3  | 698.1  |
| Cu/Co              | Multicopper oxidase mco                                                                                                                                                                                                                                                                                                                                                        | 0.0    | 0.0    | 0.0    | 956.6  | 329.5  | 254.8  |
| Cu/Au              | Copper-translocating P-type ATPase, golT                                                                                                                                                                                                                                                                                                                                       | 0.0    | 0.0    | 20.7   | 843.9  | 765.7  | 259.6  |
| Fe                 | Histidine kinase PmrB, fetA/ybbL, fetB/ybbM, dpsA                                                                                                                                                                                                                                                                                                                              | 74.5   | 218.8  | 206.8  | 490.4  | 437.4  | 318.4  |
| Fe/Mn              | Manganese/iron transporter ATP-binding protein sitA/sitB/sitC/sitD                                                                                                                                                                                                                                                                                                             | 0.0    | 0.0    | 0.0    | 677.5  | 632.1  | 463.1  |
| Mn/Mg              | Transcriptional regulator MntR, manganese efflux pump MntP                                                                                                                                                                                                                                                                                                                     | 0.0    | 0.0    | 0.0    | 335.7  | 160.7  | 202.7  |
| Mo/W               | Molybdate ABC transporter substrate-binding protein modA/modB/modC/modE                                                                                                                                                                                                                                                                                                        | 0.0    | 0.0    | 0.0    | 583.0  | 399.6  | 291.2  |
| Hg                 | Mercuric ion transporter merP, Hg(II)-responsive transcriptional regulator merR, merT, merF, merA, merB                                                                                                                                                                                                                                                                        | 14.7   | 70.7   | 22.7   | 2532.3 | 1535.8 | 1754.0 |
| Ni                 | Nickel-responsive transcriptional regulator NikR, metal resistance protein ncrB                                                                                                                                                                                                                                                                                                | 0.0    | 0.0    | 0.0    | 212.2  | 298.2  | 160.3  |
| Ni/Co              | MFS transporter nrsD/nreB, iron-dicitrate transporter subunit FecD, ferric citrate ABC transporter ATP-binding protein FecE                                                                                                                                                                                                                                                    | 0.0    | 0.0    | 10.8   | 975.3  | 835.2  | 532.2  |

|       |                                                                                                                                                                                                                                                    |      |      |      |        |        |        |
|-------|----------------------------------------------------------------------------------------------------------------------------------------------------------------------------------------------------------------------------------------------------|------|------|------|--------|--------|--------|
| Se    | Superoxide dismutase Se                                                                                                                                                                                                                            | 30.0 | 54.6 | 11.0 | 670.3  | 306.3  | 225.5  |
| Zn    | Zinc ABC transporter substrate-binding protein znuA/yebL, transcriptional regulator Zur, multidrug resistance protein MdtC, mdtA, zinc transporter ZitB, Zn(2+)-responsive transcriptional regulator, two-component system response regulator ZraR | 0.0  | 0.0  | 0.0  | 1804.4 | 1319.5 | 1005.4 |
| Zn/Te | Phosphate transporter PitA                                                                                                                                                                                                                         | 0.0  | 0.0  | 0.0  | 200.5  | 222.0  | 123.6  |
| Zn/W  | Two-component system response regulator BaeR/BaeS                                                                                                                                                                                                  | 0.0  | 0.0  | 0.0  | 428.4  | 219.5  | 194.6  |

**Table S5. Detailed information of the genomic bins retrieved from the 6 metagenomes of the Yap Trench.**

| Genomic bin ID      | Completeness (%) | Contamination (%) | RPKM | Number of contigs | Taxonomy |                |                 |
|---------------------|------------------|-------------------|------|-------------------|----------|----------------|-----------------|
|                     |                  |                   |      |                   | Domain   | Phylum         | Class           |
| Yap-D109-4435_bin1  | 66.7             | 4.9               | 1.2  | 190               | Archaea  | Thaumarchaeota | Nitrososphaeria |
| Yap-D109-4435_bin2  | 45.2             | 12.6              | 5.5  | 179               | Archaea  | Thaumarchaeota | Nitrososphaeria |
| Yap-D109-4435_bin3  | 40.9             | 6.8               | 19.9 | 272               | Archaea  | Thaumarchaeota | Nitrososphaeria |
| Yap-D109-4435_bin4  | 38.4             | 3.6               | 3.5  | 110               | Archaea  | Thaumarchaeota | Nitrososphaeria |
| Yap-D109-4435_bin5  | 35.3             | 3.9               | 8.8  | 179               | Archaea  | Thaumarchaeota | Nitrososphaeria |
| Yap-D109-4435_bin6  | 32.6             | 8.4               | 1.4  | 74                | Archaea  | Nanoarchaeota  | Woearchaeia     |
| Yap-D109-4435_bin7  | 31.3             | 5.7               | 1.9  | 132               | Archaea  | Nanoarchaeota  | Woearchaeia     |
| Yap-D109-4435_bin8  | 27.9             | 0.0               | 1.2  | 72                | Archaea  | Thaumarchaeota | Nitrososphaeria |
| Yap-D109-4435_bin9  | 27.7             | 14.6              | 3.8  | 260               | Archaea  | Thaumarchaeota | Nitrososphaeria |
| Yap-D109-4435_bin10 | 27.6             | 7.3               | 4.0  | 144               | Archaea  | Thaumarchaeota | Nitrososphaeria |
| Yap-D109-4435_bin11 | 25.1             | 12.6              | 5.1  | 134               | Archaea  | Thaumarchaeota | Nitrososphaeria |
| Yap-D109-4435_bin12 | 24.3             | 2.7               | 0.9  | 45                | Archaea  | Nanoarchaeota  | Woearchaeia     |
| Yap-D109-4435_bin13 | 22.3             | 0.0               | 0.7  | 96                | Archaea  | Thaumarchaeota | Nitrososphaeria |
| Yap-D109-4435_bin14 | 21.9             | 0.0               | 3.4  | 76                | Archaea  | Thaumarchaeota | Nitrososphaeria |
| Yap-D109-4435_bin15 | 20.1             | 0.5               | 8.1  | 59                | Archaea  | Thaumarchaeota | Nitrososphaeria |
| Yap-D109-4435_bin16 | 20.1             | 2.5               | 1.8  | 111               | Archaea  | Crenarchaeota  | unclassified    |
| Yap-D109-4435_bin17 | 19.9             | 2.8               | 0.7  | 136               | Archaea  | Nanoarchaeota  | Woearchaeia     |
| Yap-D109-4435_bin18 | 19.5             | 1.7               | 0.9  | 340               | Archaea  | Thaumarchaeota | Nitrososphaeria |
| Yap-D109-4435_bin19 | 17.7             | 0.0               | 3.0  | 69                | Archaea  | Thaumarchaeota | Nitrososphaeria |
| Yap-D109-4435_bin20 | 17.7             | 4.9               | 1.5  | 127               | Archaea  | Thaumarchaeota | Nitrososphaeria |
| Yap-D109-4435_bin21 | 16.5             | 1.9               | 2.6  | 138               | Archaea  | Thaumarchaeota | Nitrososphaeria |
| Yap-D109-4435_bin22 | 12.6             | 1.3               | 2.2  | 73                | Archaea  | Thaumarchaeota | Nitrososphaeria |
| Yap-D109-4435_bin23 | 12.6             | 1.9               | 1.6  | 127               | Archaea  | Thaumarchaeota | Nitrososphaeria |

|                     |      |      |     |     |          |                |                     |
|---------------------|------|------|-----|-----|----------|----------------|---------------------|
| Yap-D109-4435_bin24 | 11.8 | 0.0  | 0.8 | 65  | Archaea  | unclassified   | unclassified        |
| Yap-D109-4435_bin25 | 11.3 | 2.9  | 0.6 | 509 | Archaea  | Thaumarchaeota | Nitrososphaeria     |
| Yap-D109-4435_bin26 | 10.8 | 1.0  | 6.3 | 91  | Archaea  | Thaumarchaeota | Nitrososphaeria     |
| Yap-D109-4435_bin27 | 10.6 | 1.0  | 1.0 | 48  | Archaea  | Thaumarchaeota | Nitrososphaeria     |
| Yap-D109-4435_bin28 | 10.2 | 0.0  | 0.8 | 65  | Archaea  | Thaumarchaeota | Nitrososphaeria     |
| Yap-D109-4435_bin29 | 9.7  | 2.9  | 4.8 | 93  | Archaea  | Thaumarchaeota | Nitrososphaeria     |
| Yap-D109-4435_bin30 | 9.4  | 0.0  | 1.3 | 64  | Archaea  | Nanoarchaeota  | Woearchaeia         |
| Yap-D109-4435_bin31 | 8.7  | 1.0  | 0.6 | 60  | Archaea  | Thaumarchaeota | Nitrososphaeria     |
| Yap-D109-4435_bin32 | 91.6 | 7.4  | 4.9 | 206 | Bacteria | Dadabacteria   | UBA1144             |
| Yap-D109-4435_bin33 | 78.5 | 8.0  | 2.5 | 282 | Bacteria | Proteobacteria | Gammaproteobacteria |
| Yap-D109-4435_bin34 | 76.6 | 4.9  | 7.2 | 266 | Bacteria | Dadabacteria   | UBA1144             |
| Yap-D109-4435_bin35 | 75.2 | 11.8 | 1.9 | 379 | Bacteria | Proteobacteria | Gammaproteobacteria |
| Yap-D109-4435_bin36 | 74.4 | 18.8 | 3.1 | 518 | Bacteria | Dadabacteria   | UBA1144             |
| Yap-D109-4435_bin37 | 73.8 | 18.2 | 2.4 | 753 | Bacteria | Bacteroidetes  | Ignavibacteria      |
| Yap-D109-4435_bin38 | 70.6 | 9.8  | 1.2 | 621 | Bacteria | Bacteroidetes  | Bacteroidia         |
| Yap-D109-4435_bin39 | 59.7 | 14.1 | 1.4 | 290 | Bacteria | Acidobacteria  | unclassified        |
| Yap-D109-4435_bin40 | 57.6 | 6.3  | 1.4 | 328 | Bacteria | Bacteroidetes  | Bacteroidia         |
| Yap-D109-4435_bin41 | 56.5 | 2.7  | 1.4 | 189 | Bacteria | Proteobacteria | Gammaproteobacteria |
| Yap-D109-4435_bin42 | 55.5 | 1.7  | 2.4 | 195 | Bacteria | Dadabacteria   | UBA1144             |
| Yap-D109-4435_bin43 | 55.0 | 3.8  | 1.0 | 451 | Bacteria | Proteobacteria | Gammaproteobacteria |
| Yap-D109-4435_bin44 | 53.9 | 4.0  | 1.8 | 418 | Bacteria | Dadabacteria   | UBA1144             |
| Yap-D109-4435_bin45 | 53.3 | 4.3  | 1.3 | 268 | Bacteria | Omnitrophica   | unclassified        |
| Yap-D109-4435_bin46 | 51.9 | 28.3 | 1.3 | 152 | Bacteria | Omnitrophica   | koll11              |
| Yap-D109-4435_bin47 | 51.5 | 9.7  | 2.7 | 194 | Bacteria | Proteobacteria | Gammaproteobacteria |
| Yap-D109-4435_bin48 | 48.3 | 4.2  | 1.0 | 354 | Bacteria | Nitrospirae    | Nitrospira          |
| Yap-D109-4435_bin49 | 45.5 | 4.3  | 1.2 | 353 | Bacteria | Nitrospinae    | Nitrospina          |

|                     |      |      |     |     |          |                  |                     |
|---------------------|------|------|-----|-----|----------|------------------|---------------------|
| Yap-D109-4435_bin50 | 41.5 | 9.5  | 1.4 | 305 | Bacteria | unclassified     | unclassified        |
| Yap-D109-4435_bin51 | 39.4 | 17.2 | 0.6 | 683 | Bacteria | Proteobacteria   | Gammaproteobacteria |
| Yap-D109-4435_bin52 | 36.2 | 6.9  | 1.0 | 250 | Bacteria | Bacteroidetes    | unclassified        |
| Yap-D109-4435_bin53 | 34.4 | 3.4  | 4.3 | 376 | Bacteria | Dadabacteria     | UBA1144             |
| Yap-D109-4435_bin54 | 32.9 | 0.0  | 3.2 | 48  | Bacteria | UBP10            | GR-WP33-30          |
| Yap-D109-4435_bin55 | 32.0 | 4.1  | 1.0 | 261 | Bacteria | unclassified     | unclassified        |
| Yap-D109-4435_bin56 | 29.2 | 7.3  | 0.7 | 192 | Bacteria | Patescibacteria  | Paceibacteria       |
| Yap-D109-4435_bin57 | 25.6 | 3.9  | 1.1 | 92  | Bacteria | Proteobacteria   | Gammaproteobacteria |
| Yap-D109-4435_bin58 | 24.3 | 0.0  | 0.9 | 219 | Bacteria | Acidobacteria    | unclassified        |
| Yap-D109-4435_bin59 | 24.1 | 1.7  | 0.8 | 113 | Bacteria | Proteobacteria   | Gammaproteobacteria |
| Yap-D109-4435_bin60 | 24.1 | 3.5  | 1.7 | 89  | Bacteria | Bacteroidetes    | Ignavibacteria      |
| Yap-D109-4435_bin61 | 23.3 | 10.3 | 1.7 | 59  | Bacteria | Patescibacteria  | Paceibacteria       |
| Yap-D109-4435_bin62 | 22.6 | 0.1  | 0.7 | 204 | Bacteria | Bacteroidetes    | unclassified        |
| Yap-D109-4435_bin63 | 21.6 | 0.0  | 1.6 | 76  | Bacteria | Verrucomicrobia  | unclassified        |
| Yap-D109-4435_bin64 | 21.3 | 0.3  | 1.7 | 203 | Bacteria | Bacteroidetes    | Bacteroidia         |
| Yap-D109-4435_bin65 | 20.1 | 0.0  | 2.5 | 276 | Bacteria | Dadabacteria     | UBA1144             |
| Yap-D109-4435_bin66 | 19.9 | 1.7  | 2.6 | 143 | Bacteria | unclassified     | unclassified        |
| Yap-D109-4435_bin67 | 19.7 | 3.5  | 1.3 | 209 | Bacteria | Dadabacteria     | UBA1144             |
| Yap-D109-4435_bin68 | 18.1 | 2.8  | 0.5 | 168 | Bacteria | Omnitrophica     | unclassified        |
| Yap-D109-4435_bin69 | 17.4 | 3.5  | 1.7 | 133 | Bacteria | Proteobacteria   | Gammaproteobacteria |
| Yap-D109-4435_bin70 | 17.2 | 0.0  | 1.2 | 76  | Bacteria | Proteobacteria   | Gammaproteobacteria |
| Yap-D109-4435_bin71 | 17.1 | 1.7  | 1.2 | 164 | Bacteria | Nitrospinae      | Nitrospina          |
| Yap-D109-4435_bin72 | 16.4 | 0.0  | 1.5 | 44  | Bacteria | Proteobacteria   | Gammaproteobacteria |
| Yap-D109-4435_bin73 | 16.1 | 0.8  | 0.8 | 456 | Bacteria | Nitrospirae      | Nitrospira          |
| Yap-D109-4435_bin74 | 15.7 | 0.0  | 0.7 | 162 | Bacteria | unclassified     | unclassified        |
| Yap-D109-4435_bin75 | 15.5 | 4.3  | 0.7 | 85  | Bacteria | Margulisbacteria | unclassified        |

|                      |      |     |     |     |          |                |                     |
|----------------------|------|-----|-----|-----|----------|----------------|---------------------|
| Yap-D109-4435_bin76  | 15.4 | 0.0 | 1.1 | 43  | Bacteria | Proteobacteria | Gammaproteobacteria |
| Yap-D109-4435_bin77  | 15.1 | 0.0 | 1.2 | 73  | Bacteria | unclassified   | unclassified        |
| Yap-D109-4435_bin78  | 14.4 | 0.0 | 0.5 | 133 | Bacteria | Dependentiae   | Babeliae            |
| Yap-D109-4435_bin79  | 13.5 | 0.4 | 0.9 | 116 | Bacteria | Proteobacteria | Gammaproteobacteria |
| Yap-D109-4435_bin80  | 12.5 | 3.6 | 0.9 | 260 | Bacteria | Proteobacteria | Gammaproteobacteria |
| Yap-D109-4435_bin81  | 12.4 | 0.0 | 2.3 | 208 | Bacteria | unclassified   | unclassified        |
| Yap-D109-4435_bin82  | 12.2 | 0.0 | 2.7 | 30  | Bacteria | unclassified   | unclassified        |
| Yap-D109-4435_bin83  | 11.7 | 0.4 | 1.3 | 42  | Bacteria | Proteobacteria | Gammaproteobacteria |
| Yap-D109-4435_bin84  | 9.9  | 0.0 | 1.5 | 99  | Bacteria | unclassified   | unclassified        |
| Yap-D109-4435_bin85  | 9.2  | 0.0 | 1.0 | 115 | Bacteria | Bacteroidetes  | Bacteroidia         |
| Yap-D109-4435_bin86  | 9.2  | 1.7 | 1.2 | 48  | Bacteria | Dependentiae   | Babeliae            |
| Yap-D109-4435_bin87  | 8.9  | 1.7 | 1.2 | 255 | Bacteria | unclassified   | unclassified        |
| Yap-D109-4435_bin88  | 8.7  | 0.3 | 1.2 | 42  | Bacteria | Bacteroidetes  | Bacteroidia         |
| Yap-D109-4435_bin89  | 8.6  | 0.0 | 1.0 | 26  | Bacteria | Proteobacteria | Gammaproteobacteria |
| Yap-D109-4435_bin90  | 8.5  | 0.0 | 0.8 | 105 | Bacteria | Zixibacteria   | MSB-5A5             |
| Yap-D109-4435_bin91  | 8.2  | 0.0 | 0.9 | 131 | Bacteria | Nitrospirae    | Nitrospira          |
| Yap-D109-4435_bin92  | 8.0  | 0.0 | 1.8 | 35  | Bacteria | Bacteroidetes  | Ignavibacteria      |
| Yap-D109-4435_bin93  | 7.0  | 0.0 | 9.3 | 136 | Bacteria | Dadabacteria   | UBA1144             |
| Yap-D109-4435_bin94  | 6.2  | 0.1 | 0.7 | 81  | Bacteria | Proteobacteria | unclassified        |
| Yap-D109-4435_bin95  | 6.0  | 0.0 | 0.7 | 87  | Bacteria | Omnitrophica   | Omnitrophica        |
| Yap-D109-4435_bin96  | 6.0  | 0.0 | 1.0 | 38  | Bacteria | Bacteroidetes  | Bacteroidia         |
| Yap-D109-4435_bin97  | 5.6  | 0.0 | 0.6 | 84  | Bacteria | unclassified   | unclassified        |
| Yap-D109-4435_bin98  | 4.4  | 0.0 | 0.6 | 41  | Bacteria | unclassified   | unclassified        |
| Yap-D109-4435_bin99  | 3.5  | 0.0 | 1.0 | 30  | Bacteria | Proteobacteria | Gammaproteobacteria |
| Yap-D109-4435_bin100 | 3.0  | 0.0 | 1.6 | 33  | Bacteria | unclassified   | unclassified        |
| Yap-D109-4435_bin101 | 1.7  | 0.0 | 0.9 | 178 | Bacteria | Bacteroidetes  | Bacteroidia         |

|                      |      |      |      |      |              |                 |                     |
|----------------------|------|------|------|------|--------------|-----------------|---------------------|
| Yap-D109-4435_bin102 | 0.8  | 0.0  | 0.7  | 43   | Bacteria     | Patescibacteria | Paceibacteria       |
| Yap-D109-4435_bin103 | 24.2 | 1.9  | 0.6  | 1491 | unclassified | unclassified    | unclassified        |
| Yap-D109-4435_bin104 | 22.7 | 1.0  | 1.3  | 154  | unclassified | unclassified    | unclassified        |
| Yap-D109-4435_bin105 | 10.3 | 0.0  | 1.6  | 6043 | unclassified | unclassified    | unclassified        |
| Yap-D109-4435_bin106 | 8.3  | 0.0  | 1.0  | 2917 | unclassified | unclassified    | unclassified        |
| Yap-D109-4435_bin107 | 6.1  | 0.2  | 1.8  | 91   | unclassified | unclassified    | unclassified        |
| Yap-D109-4435_bin108 | 5.6  | 0.0  | 1.2  | 1312 | unclassified | unclassified    | unclassified        |
| Yap-D109-4435_bin109 | 0.0  | 0.0  | 0.7  | 3225 | unclassified | unclassified    | unclassified        |
| Yap-MC02-4568_bin1   | 52.4 | 5.8  | 27.5 | 113  | Archaea      | Thaumarchaeota  | Nitrososphaeria     |
| Yap-MC02-4568_bin2   | 38.7 | 2.9  | 1.5  | 145  | Archaea      | Thaumarchaeota  | Nitrososphaeria     |
| Yap-MC02-4568_bin3   | 38.6 | 4.9  | 1.7  | 285  | Archaea      | Thaumarchaeota  | Nitrososphaeria     |
| Yap-MC02-4568_bin4   | 34.6 | 5.8  | 25.0 | 205  | Archaea      | Thaumarchaeota  | Nitrososphaeria     |
| Yap-MC02-4568_bin5   | 32.8 | 0.0  | 1.7  | 145  | Archaea      | Crenarchaeota   | unclassified        |
| Yap-MC02-4568_bin6   | 27.0 | 4.2  | 4.9  | 62   | Archaea      | Thaumarchaeota  | Nitrososphaeria     |
| Yap-MC02-4568_bin7   | 27.0 | 0.0  | 1.3  | 86   | Archaea      | Nanoarchaeota   | Woeearchaeia        |
| Yap-MC02-4568_bin8   | 22.3 | 8.7  | 2.2  | 713  | Archaea      | Thaumarchaeota  | Nitrososphaeria     |
| Yap-MC02-4568_bin9   | 19.3 | 1.9  | 23.6 | 124  | Archaea      | Thaumarchaeota  | Nitrososphaeria     |
| Yap-MC02-4568_bin10  | 11.7 | 1.9  | 10.5 | 77   | Archaea      | Thaumarchaeota  | Nitrososphaeria     |
| Yap-MC02-4568_bin11  | 9.0  | 0.3  | 1.7  | 67   | Archaea      | Thaumarchaeota  | Nitrososphaeria     |
| Yap-MC02-4568_bin12  | 7.2  | 0.0  | 2.2  | 81   | Archaea      | Thaumarchaeota  | Nitrososphaeria     |
| Yap-MC02-4568_bin13  | 6.1  | 2.4  | 2.4  | 82   | Archaea      | Thaumarchaeota  | Nitrososphaeria     |
| Yap-MC02-4568_bin14  | 4.2  | 0.0  | 48.2 | 46   | Archaea      | Thaumarchaeota  | Nitrososphaeria     |
| Yap-MC02-4568_bin15  | 92.2 | 1.3  | 3.3  | 141  | Bacteria     | Proteobacteria  | Gammaproteobacteria |
| Yap-MC02-4568_bin16  | 92.2 | 13.7 | 3.0  | 459  | Bacteria     | Bacteroidetes   | Bacteroidia         |
| Yap-MC02-4568_bin17  | 87.9 | 11.3 | 2.2  | 796  | Bacteria     | Nitrospirae     | Nitrospira          |
| Yap-MC02-4568_bin18  | 84.6 | 37.9 | 1.7  | 1261 | Bacteria     | Bacteroidetes   | Bacteroidia         |



|                     |      |      |      |     |          |                |                     |
|---------------------|------|------|------|-----|----------|----------------|---------------------|
| Yap-MC02-4568_bin19 | 83.1 | 4.1  | 2.4  | 585 | Bacteria | Proteobacteria | Alphaproteobacteria |
| Yap-MC02-4568_bin20 | 80.9 | 16.8 | 3.4  | 624 | Bacteria | Chloroflexi    | Anaerolineae        |
| Yap-MC02-4568_bin21 | 76.3 | 7.2  | 3.9  | 238 | Bacteria | Proteobacteria | Gammaproteobacteria |
| Yap-MC02-4568_bin22 | 73.7 | 6.2  | 5.4  | 198 | Bacteria | Proteobacteria | Gammaproteobacteria |
| Yap-MC02-4568_bin23 | 73.5 | 6.4  | 5.2  | 363 | Bacteria | Dadabacteria   | UBA1144             |
| Yap-MC02-4568_bin24 | 73.5 | 7.7  | 3.7  | 499 | Bacteria | Nitrospirae    | Nitrospiria         |
| Yap-MC02-4568_bin25 | 72.7 | 6.0  | 2.1  | 294 | Bacteria | Proteobacteria | Gammaproteobacteria |
| Yap-MC02-4568_bin26 | 65.2 | 3.1  | 10.8 | 132 | Bacteria | Proteobacteria | Gammaproteobacteria |
| Yap-MC02-4568_bin27 | 62.7 | 22.8 | 1.8  | 734 | Bacteria | Bacteroidetes  | Bacteroidia         |
| Yap-MC02-4568_bin28 | 62.7 | 5.3  | 3.7  | 202 | Bacteria | Dadabacteria   | UBA1144             |
| Yap-MC02-4568_bin29 | 60.1 | 5.9  | 2.2  | 387 | Bacteria | Chloroflexi    | Dehalococcoidia     |
| Yap-MC02-4568_bin30 | 59.3 | 19.8 | 1.8  | 859 | Bacteria | Acidobacteria  | unclassified        |
| Yap-MC02-4568_bin31 | 58.7 | 1.2  | 1.9  | 357 | Bacteria | Chloroflexi    | Dehalococcoidia     |
| Yap-MC02-4568_bin32 | 55.2 | 2.6  | 2.7  | 409 | Bacteria | Proteobacteria | Gammaproteobacteria |
| Yap-MC02-4568_bin33 | 54.9 | 17.6 | 5.0  | 690 | Bacteria | Dadabacteria   | UBA1144             |
| Yap-MC02-4568_bin34 | 52.5 | 15.5 | 3.3  | 587 | Bacteria | Bacteroidetes  | Ignavibacteria      |
| Yap-MC02-4568_bin35 | 51.8 | 6.6  | 5.2  | 450 | Bacteria | Proteobacteria | Gammaproteobacteria |
| Yap-MC02-4568_bin36 | 51.0 | 1.3  | 1.7  | 291 | Bacteria | Proteobacteria | Gammaproteobacteria |
| Yap-MC02-4568_bin37 | 50.6 | 11.7 | 3.0  | 278 | Bacteria | Proteobacteria | Gammaproteobacteria |
| Yap-MC02-4568_bin38 | 50.4 | 3.0  | 2.0  | 778 | Bacteria | Chloroflexi    | Dehalococcoidia     |
| Yap-MC02-4568_bin39 | 47.7 | 2.9  | 5.5  | 394 | Bacteria | Nitrospirae    | Nitrospiria         |
| Yap-MC02-4568_bin40 | 45.8 | 4.0  | 2.7  | 485 | Bacteria | Bacteroidetes  | Ignavibacteria      |
| Yap-MC02-4568_bin41 | 43.0 | 1.7  | 1.6  | 365 | Bacteria | Proteobacteria | Gammaproteobacteria |
| Yap-MC02-4568_bin42 | 42.5 | 5.2  | 1.6  | 322 | Bacteria | Dadabacteria   | UBA1144             |
| Yap-MC02-4568_bin43 | 42.3 | 6.3  | 7.7  | 431 | Bacteria | UBP10          | GR-WP33-30          |
| Yap-MC02-4568_bin44 | 41.8 | 1.9  | 1.7  | 251 | Bacteria | Dependentiae   | Babeliae            |

|                     |      |      |     |     |          |                    |                     |
|---------------------|------|------|-----|-----|----------|--------------------|---------------------|
| Yap-MC02-4568_bin45 | 39.0 | 0.0  | 1.7 | 295 | Bacteria | Nitrospinae        | Nitrospina          |
| Yap-MC02-4568_bin46 | 37.2 | 3.6  | 4.0 | 273 | Bacteria | UBP10              | GR-WP33-30          |
| Yap-MC02-4568_bin47 | 36.2 | 0.0  | 3.5 | 395 | Bacteria | Proteobacteria     | Gammaproteobacteria |
| Yap-MC02-4568_bin48 | 32.8 | 0.9  | 1.9 | 198 | Bacteria | Proteobacteria     | Gammaproteobacteria |
| Yap-MC02-4568_bin49 | 31.8 | 1.7  | 1.4 | 406 | Bacteria | Proteobacteria     | Gammaproteobacteria |
| Yap-MC02-4568_bin50 | 30.3 | 2.5  | 6.6 | 229 | Bacteria | Proteobacteria     | Gammaproteobacteria |
| Yap-MC02-4568_bin51 | 29.6 | 16.7 | 1.7 | 549 | Bacteria | Nitrospinae        | Nitrospina          |
| Yap-MC02-4568_bin52 | 28.8 | 0.9  | 1.7 | 125 | Bacteria | Nitrospirae        | Nitrospira          |
| Yap-MC02-4568_bin53 | 26.0 | 6.2  | 4.9 | 105 | Bacteria | Acidobacteria      | unclassified        |
| Yap-MC02-4568_bin54 | 25.9 | 1.7  | 1.2 | 528 | Bacteria | Bacteroidetes      | unclassified        |
| Yap-MC02-4568_bin55 | 24.1 | 0.0  | 3.1 | 69  | Bacteria | Nitrospinae        | Nitrospina          |
| Yap-MC02-4568_bin56 | 24.1 | 3.0  | 7.5 | 273 | Bacteria | Proteobacteria     | Gammaproteobacteria |
| Yap-MC02-4568_bin57 | 23.4 | 1.7  | 1.8 | 151 | Bacteria | Nitrospinae        | Nitrospina          |
| Yap-MC02-4568_bin58 | 22.4 | 1.9  | 3.8 | 228 | Bacteria | UBP10              | GR-WP33-30          |
| Yap-MC02-4568_bin59 | 22.4 | 1.7  | 4.1 | 173 | Bacteria | Proteobacteria     | Gammaproteobacteria |
| Yap-MC02-4568_bin60 | 22.2 | 0.0  | 1.6 | 49  | Bacteria | Actinobacteria     | Acidimicrobiia      |
| Yap-MC02-4568_bin61 | 21.7 | 0.6  | 1.6 | 190 | Bacteria | Nitrospirae        | Nitrospira          |
| Yap-MC02-4568_bin62 | 21.7 | 3.3  | 5.8 | 133 | Bacteria | Proteobacteria     | Gammaproteobacteria |
| Yap-MC02-4568_bin63 | 21.2 | 4.7  | 1.6 | 362 | Bacteria | Nitrospirae        | Nitrospira          |
| Yap-MC02-4568_bin64 | 20.7 | 0.0  | 1.6 | 156 | Bacteria | Bacteroidetes      | Bacteroidia         |
| Yap-MC02-4568_bin65 | 20.7 | 0.9  | 1.6 | 179 | Bacteria | Nitrospinae        | Nitrospina          |
| Yap-MC02-4568_bin66 | 18.0 | 0.5  | 1.3 | 114 | Bacteria | Desulfobacteraeota | unclassified        |
| Yap-MC02-4568_bin67 | 17.7 | 0.0  | 1.0 | 410 | Bacteria | Proteobacteria     | Gammaproteobacteria |
| Yap-MC02-4568_bin68 | 16.6 | 0.0  | 6.8 | 47  | Bacteria | Nitrospirae        | Nitrospira          |
| Yap-MC02-4568_bin69 | 15.7 | 0.0  | 1.2 | 507 | Bacteria | Bacteroidetes      | unclassified        |
| Yap-MC02-4568_bin70 | 15.4 | 1.8  | 1.4 | 100 | Bacteria | Chloroflexi        | Dehalococcoidia     |

|                     |      |      |      |     |              |                     |                     |
|---------------------|------|------|------|-----|--------------|---------------------|---------------------|
| Yap-MC02-4568_bin71 | 13.8 | 0.0  | 1.2  | 293 | Bacteria     | Proteobacteria      | Gammaproteobacteria |
| Yap-MC02-4568_bin72 | 12.6 | 0.7  | 5.0  | 85  | Bacteria     | Acidobacteria       | unclassified        |
| Yap-MC02-4568_bin73 | 12.5 | 0.0  | 6.1  | 151 | Bacteria     | Nitrospinae         | Nitrospina          |
| Yap-MC02-4568_bin74 | 12.2 | 0.0  | 1.5  | 129 | Bacteria     | Nitrospirae         | Nitrospira          |
| Yap-MC02-4568_bin75 | 11.2 | 0.0  | 1.7  | 142 | Bacteria     | Bacteroidetes       | Bacteroidia         |
| Yap-MC02-4568_bin76 | 11.1 | 1.7  | 2.7  | 306 | Bacteria     | UBP10               | unclassified        |
| Yap-MC02-4568_bin77 | 9.9  | 1.8  | 1.9  | 140 | Bacteria     | Proteobacteria      | Alphaproteobacteria |
| Yap-MC02-4568_bin78 | 9.3  | 0.0  | 1.1  | 139 | Bacteria     | unclassified        | unclassified        |
| Yap-MC02-4568_bin79 | 8.6  | 0.0  | 2.7  | 132 | Bacteria     | UBP10               | GR-WP33-30          |
| Yap-MC02-4568_bin80 | 8.6  | 0.0  | 1.0  | 66  | Bacteria     | Methylomirabilaeota | Methylomirabilia    |
| Yap-MC02-4568_bin81 | 8.2  | 0.0  | 1.2  | 78  | Bacteria     | unclassified        | unclassified        |
| Yap-MC02-4568_bin82 | 5.8  | 3.5  | 2.1  | 130 | Bacteria     | Proteobacteria      | Gammaproteobacteria |
| Yap-MC02-4568_bin83 | 5.7  | 0.0  | 1.3  | 134 | Bacteria     | Proteobacteria      | unclassified        |
| Yap-MC02-4568_bin84 | 5.1  | 0.0  | 3.0  | 293 | Bacteria     | Chloroflexi         | Anaerolineae        |
| Yap-MC02-4568_bin85 | 5.1  | 0.0  | 2.1  | 206 | Bacteria     | Proteobacteria      | Gammaproteobacteria |
| Yap-MC02-4568_bin86 | 3.6  | 0.5  | 1.5  | 511 | Bacteria     | unclassified        | unclassified        |
| Yap-MC02-4568_bin87 | 2.8  | 0.0  | 2.4  | 23  | Bacteria     | Proteobacteria      | Alphaproteobacteria |
| Yap-MC02-4568_bin88 | 2.7  | 0.0  | 2.2  | 97  | Bacteria     | Bacteroidetes       | Bacteroidia         |
| Yap-MC02-4568_bin89 | 5.5  | 0.0  | 2.1  | 48  | unclassified | unclassified        | unclassified        |
| Yap-MC02-4568_bin90 | 2.4  | 0.0  | 1.7  | 233 | unclassified | unclassified        | unclassified        |
| Yap-D113-6578_bin1  | 56.3 | 12.6 | 31.3 | 177 | Archaea      | Thaumarchaeota      | Nitrososphaeria     |
| Yap-D113-6578_bin2  | 55.3 | 11.8 | 9.8  | 238 | Archaea      | Thaumarchaeota      | Nitrososphaeria     |
| Yap-D113-6578_bin3  | 45.0 | 5.8  | 27.3 | 92  | Archaea      | Thaumarchaeota      | Nitrososphaeria     |
| Yap-D113-6578_bin4  | 37.5 | 12.7 | 8.0  | 132 | Archaea      | Thaumarchaeota      | Nitrososphaeria     |
| Yap-D113-6578_bin5  | 37.0 | 9.0  | 4.1  | 176 | Archaea      | Thaumarchaeota      | Nitrososphaeria     |
| Yap-D113-6578_bin6  | 36.0 | 1.0  | 1.0  | 78  | Archaea      | Thaumarchaeota      | Nitrososphaeria     |

|                     |      |     |      |     |         |                |                 |
|---------------------|------|-----|------|-----|---------|----------------|-----------------|
| Yap-D113-6578_bin7  | 32.0 | 1.6 | 2.2  | 90  | Archaea | Nanoarchaeota  | Woearchaeia     |
| Yap-D113-6578_bin8  | 28.6 | 0.0 | 6.2  | 64  | Archaea | Thaumarchaeota | Nitrososphaeria |
| Yap-D113-6578_bin9  | 28.2 | 6.5 | 2.5  | 78  | Archaea | Nanoarchaeota  | Woearchaeia     |
| Yap-D113-6578_bin10 | 25.0 | 0.9 | 3.0  | 73  | Archaea | Nanoarchaeota  | Woearchaeia     |
| Yap-D113-6578_bin11 | 24.6 | 2.3 | 3.4  | 59  | Archaea | Thaumarchaeota | Nitrososphaeria |
| Yap-D113-6578_bin12 | 23.2 | 0.0 | 1.5  | 37  | Archaea | Nanoarchaeota  | Woearchaeia     |
| Yap-D113-6578_bin13 | 22.2 | 0.9 | 0.5  | 67  | Archaea | Nanoarchaeota  | Woearchaeia     |
| Yap-D113-6578_bin14 | 18.8 | 0.0 | 4.9  | 68  | Archaea | Thaumarchaeota | Nitrososphaeria |
| Yap-D113-6578_bin15 | 18.5 | 1.2 | 4.1  | 70  | Archaea | Thaumarchaeota | Nitrososphaeria |
| Yap-D113-6578_bin16 | 17.2 | 0.0 | 19.1 | 60  | Archaea | Thaumarchaeota | Nitrososphaeria |
| Yap-D113-6578_bin17 | 16.8 | 0.9 | 1.5  | 23  | Archaea | Nanoarchaeota  | Woearchaeia     |
| Yap-D113-6578_bin18 | 16.5 | 2.9 | 1.5  | 264 | Archaea | Thaumarchaeota | Nitrososphaeria |
| Yap-D113-6578_bin19 | 16.1 | 1.4 | 0.8  | 36  | Archaea | Nanoarchaeota  | Woearchaeia     |
| Yap-D113-6578_bin20 | 15.9 | 0.0 | 0.8  | 45  | Archaea | Nanoarchaeota  | Woearchaeia     |
| Yap-D113-6578_bin21 | 15.0 | 6.1 | 1.2  | 39  | Archaea | Nanoarchaeota  | Woearchaeia     |
| Yap-D113-6578_bin22 | 13.8 | 2.9 | 27.8 | 113 | Archaea | Thaumarchaeota | Nitrososphaeria |
| Yap-D113-6578_bin23 | 13.6 | 0.9 | 1.2  | 31  | Archaea | Microarchaeota | Iainarchaeia    |
| Yap-D113-6578_bin24 | 13.1 | 0.0 | 1.1  | 40  | Archaea | Nanoarchaeota  | Woearchaeia     |
| Yap-D113-6578_bin25 | 12.9 | 0.9 | 0.6  | 37  | Archaea | Nanoarchaeota  | Woearchaeia     |
| Yap-D113-6578_bin26 | 11.7 | 1.3 | 0.8  | 79  | Archaea | Nanoarchaeota  | Woearchaeia     |
| Yap-D113-6578_bin27 | 11.3 | 0.0 | 1.6  | 51  | Archaea | Thaumarchaeota | Nitrososphaeria |
| Yap-D113-6578_bin28 | 11.2 | 0.0 | 1.2  | 29  | Archaea | Nanoarchaeota  | Woearchaeia     |
| Yap-D113-6578_bin29 | 10.4 | 1.0 | 2.5  | 71  | Archaea | Thaumarchaeota | Nitrososphaeria |
| Yap-D113-6578_bin30 | 10.2 | 1.5 | 2.0  | 61  | Archaea | Thaumarchaeota | Nitrososphaeria |
| Yap-D113-6578_bin31 | 7.9  | 0.0 | 0.5  | 217 | Archaea | Thaumarchaeota | Nitrososphaeria |
| Yap-D113-6578_bin32 | 7.5  | 0.9 | 1.8  | 24  | Archaea | Nanoarchaeota  | Woearchaeia     |

|                     |      |      |     |     |          |                 |                     |
|---------------------|------|------|-----|-----|----------|-----------------|---------------------|
| Yap-D113-6578_bin33 | 6.8  | 0.0  | 0.7 | 32  | Archaea  | Nanoarchaeota   | Woearchaeia         |
| Yap-D113-6578_bin34 | 6.4  | 1.9  | 2.2 | 103 | Archaea  | Thaumarchaeota  | Nitrososphaeria     |
| Yap-D113-6578_bin35 | 6.1  | 0.0  | 2.1 | 40  | Archaea  | Nanoarchaeota   | Woearchaeia         |
| Yap-D113-6578_bin36 | 86.0 | 1.8  | 1.1 | 510 | Bacteria | Proteobacteria  | Gammaproteobacteria |
| Yap-D113-6578_bin37 | 75.9 | 13.7 | 1.2 | 386 | Bacteria | Nitrospirae     | Nitrospiria         |
| Yap-D113-6578_bin38 | 71.5 | 8.0  | 6.2 | 330 | Bacteria | UBP10           | GR-WP33-30          |
| Yap-D113-6578_bin39 | 64.5 | 3.6  | 1.6 | 52  | Bacteria | Patescibacteria | WWE3                |
| Yap-D113-6578_bin40 | 62.7 | 14.2 | 1.6 | 538 | Bacteria | Nitrospinae     | Nitrospina          |
| Yap-D113-6578_bin41 | 59.8 | 35.1 | 0.9 | 635 | Bacteria | Omnitrophica    | koll11              |
| Yap-D113-6578_bin42 | 59.2 | 3.3  | 2.0 | 256 | Bacteria | Bacteroidetes   | unclassified        |
| Yap-D113-6578_bin43 | 57.7 | 2.2  | 1.3 | 326 | Bacteria | Proteobacteria  | Gammaproteobacteria |
| Yap-D113-6578_bin44 | 57.2 | 10.2 | 3.1 | 557 | Bacteria | Dadabacteria    | UBA1144             |
| Yap-D113-6578_bin45 | 56.1 | 20.5 | 0.7 | 736 | Bacteria | Nitrospinae     | Nitrospina          |
| Yap-D113-6578_bin46 | 55.2 | 15.6 | 0.8 | 635 | Bacteria | UBP10           | GR-WP33-30          |
| Yap-D113-6578_bin47 | 53.9 | 7.8  | 3.5 | 297 | Bacteria | Dadabacteria    | UBA1144             |
| Yap-D113-6578_bin48 | 53.5 | 5.1  | 1.3 | 531 | Bacteria | Bacteroidetes   | Bacteroidia         |
| Yap-D113-6578_bin49 | 50.7 | 30.8 | 1.3 | 391 | Bacteria | Marinimicrobia  | unclassified        |
| Yap-D113-6578_bin50 | 49.6 | 12.7 | 0.9 | 445 | Bacteria | Elusimicrobia   | unclassified        |
| Yap-D113-6578_bin51 | 48.3 | 5.2  | 1.1 | 131 | Bacteria | Proteobacteria  | Gammaproteobacteria |
| Yap-D113-6578_bin52 | 47.7 | 6.4  | 1.2 | 382 | Bacteria | Bacteroidetes   | Bacteroidia         |
| Yap-D113-6578_bin53 | 47.6 | 0.9  | 2.5 | 201 | Bacteria | Nitrospinae     | Nitrospina          |
| Yap-D113-6578_bin54 | 47.6 | 17.2 | 0.9 | 267 | Bacteria | Verrucomicrobia | Chlamydiia          |
| Yap-D113-6578_bin55 | 47.4 | 11.0 | 0.7 | 325 | Bacteria | Omnitrophica    | koll11              |
| Yap-D113-6578_bin56 | 47.3 | 5.6  | 3.5 | 346 | Bacteria | Bacteroidetes   | Ignavibacteria      |
| Yap-D113-6578_bin57 | 47.0 | 12.5 | 1.7 | 339 | Bacteria | Proteobacteria  | Gammaproteobacteria |
| Yap-D113-6578_bin58 | 44.6 | 0.0  | 0.6 | 220 | Bacteria | Actinobacteria  | Acidimicrobiia      |

|                     |      |      |     |      |          |                    |                     |
|---------------------|------|------|-----|------|----------|--------------------|---------------------|
| Yap-D113-6578_bin59 | 44.5 | 5.5  | 2.1 | 181  | Bacteria | Proteobacteria     | Gammaproteobacteria |
| Yap-D113-6578_bin60 | 44.4 | 35.4 | 0.7 | 268  | Bacteria | Dependentiae       | Babeliae            |
| Yap-D113-6578_bin61 | 44.3 | 12.1 | 0.9 | 90   | Bacteria | Patescibacteria    | Paceibacteria       |
| Yap-D113-6578_bin62 | 43.9 | 26.0 | 0.6 | 1459 | Bacteria | unclassified       | unclassified        |
| Yap-D113-6578_bin63 | 43.5 | 7.1  | 0.9 | 353  | Bacteria | Proteobacteria     | Gammaproteobacteria |
| Yap-D113-6578_bin64 | 43.1 | 12.1 | 0.8 | 120  | Bacteria | Proteobacteria     | Gammaproteobacteria |
| Yap-D113-6578_bin65 | 41.4 | 14.6 | 0.5 | 2555 | Bacteria | unclassified       | unclassified        |
| Yap-D113-6578_bin66 | 40.0 | 9.0  | 0.6 | 143  | Bacteria | Patescibacteria    | Paceibacteria       |
| Yap-D113-6578_bin67 | 40.0 | 3.7  | 4.0 | 265  | Bacteria | Acidobacteria      | unclassified        |
| Yap-D113-6578_bin68 | 39.2 | 7.5  | 0.8 | 315  | Bacteria | unclassified       | unclassified        |
| Yap-D113-6578_bin69 | 37.5 | 2.3  | 2.1 | 210  | Bacteria | Proteobacteria     | Gammaproteobacteria |
| Yap-D113-6578_bin70 | 37.3 | 10.3 | 0.6 | 235  | Bacteria | Omnitrophica       | koll11              |
| Yap-D113-6578_bin71 | 37.3 | 5.0  | 1.4 | 506  | Bacteria | unclassified       | unclassified        |
| Yap-D113-6578_bin72 | 36.8 | 1.1  | 0.8 | 126  | Bacteria | Bdellovibrionaeota | UBA2394             |
| Yap-D113-6578_bin73 | 36.1 | 6.9  | 0.7 | 208  | Bacteria | Bacteroidetes      | Ignavibacteria      |
| Yap-D113-6578_bin74 | 35.2 | 5.5  | 1.9 | 290  | Bacteria | Bacteroidetes      | Bacteroidia         |
| Yap-D113-6578_bin75 | 34.7 | 6.5  | 0.9 | 164  | Bacteria | Proteobacteria     | Gammaproteobacteria |
| Yap-D113-6578_bin76 | 34.6 | 3.5  | 1.2 | 74   | Bacteria | Patescibacteria    | Paceibacteria       |
| Yap-D113-6578_bin77 | 34.5 | 10.3 | 1.1 | 552  | Bacteria | Bacteroidetes      | Bacteroidia         |
| Yap-D113-6578_bin78 | 33.5 | 0.0  | 0.7 | 239  | Bacteria | Chloroflexi        | Anaerolineae        |
| Yap-D113-6578_bin79 | 33.3 | 2.3  | 1.1 | 124  | Bacteria | Omnitrophica       | Omnitrophica        |
| Yap-D113-6578_bin80 | 32.0 | 9.3  | 0.5 | 1584 | Bacteria | Proteobacteria     | Gammaproteobacteria |
| Yap-D113-6578_bin81 | 31.6 | 7.3  | 0.5 | 767  | Bacteria | Chloroflexi        | Dehalococcoidia     |
| Yap-D113-6578_bin82 | 30.6 | 6.3  | 0.6 | 402  | Bacteria | unclassified       | unclassified        |
| Yap-D113-6578_bin83 | 29.8 | 0.0  | 0.6 | 195  | Bacteria | unclassified       | unclassified        |
| Yap-D113-6578_bin84 | 29.3 | 5.0  | 0.5 | 116  | Bacteria | Patescibacteria    | Paceibacteria       |

|                      |      |     |     |     |          |                  |                     |
|----------------------|------|-----|-----|-----|----------|------------------|---------------------|
| Yap-D113-6578_bin85  | 29.2 | 1.4 | 0.7 | 157 | Bacteria | Verrucomicrobia  | Verrucomicrobiae    |
| Yap-D113-6578_bin86  | 28.7 | 0.1 | 1.1 | 112 | Bacteria | Bacteroidetes    | Bacteroidia         |
| Yap-D113-6578_bin87  | 28.5 | 0.9 | 2.0 | 176 | Bacteria | Nitrospinae      | Nitrospina          |
| Yap-D113-6578_bin88  | 28.4 | 5.2 | 0.9 | 74  | Bacteria | Patescibacteria  | Microgenomatia      |
| Yap-D113-6578_bin89  | 27.3 | 6.8 | 0.7 | 162 | Bacteria | Patescibacteria  | Gracilibacteria     |
| Yap-D113-6578_bin90  | 25.9 | 0.0 | 1.9 | 121 | Bacteria | Bacteroidetes    | Bacteroidia         |
| Yap-D113-6578_bin91  | 25.2 | 1.0 | 1.7 | 45  | Bacteria | unclassified     | unclassified        |
| Yap-D113-6578_bin92  | 25.0 | 3.5 | 0.9 | 522 | Bacteria | Proteobacteria   | unclassified        |
| Yap-D113-6578_bin93  | 24.8 | 2.0 | 1.5 | 26  | Bacteria | Patescibacteria  | Paceibacteria       |
| Yap-D113-6578_bin94  | 24.1 | 2.6 | 0.8 | 48  | Bacteria | Patescibacteria  | Microgenomatia      |
| Yap-D113-6578_bin95  | 24.1 | 5.2 | 1.3 | 227 | Bacteria | Omnitrophica     | unclassified        |
| Yap-D113-6578_bin96  | 24.1 | 4.5 | 0.9 | 105 | Bacteria | Planctomycetes   | Phycisphaerae       |
| Yap-D113-6578_bin97  | 23.4 | 1.7 | 0.7 | 76  | Bacteria | Patescibacteria  | Paceibacteria       |
| Yap-D113-6578_bin98  | 23.3 | 0.0 | 0.6 | 312 | Bacteria | Planctomycetes   | Phycisphaerae       |
| Yap-D113-6578_bin99  | 23.3 | 6.9 | 0.6 | 217 | Bacteria | Bacteroidetes    | unclassified        |
| Yap-D113-6578_bin100 | 23.2 | 1.7 | 0.7 | 53  | Bacteria | Patescibacteria  | Paceibacteria       |
| Yap-D113-6578_bin101 | 22.4 | 0.0 | 1.7 | 396 | Bacteria | Proteobacteria   | Gammaproteobacteria |
| Yap-D113-6578_bin102 | 22.4 | 0.0 | 0.8 | 114 | Bacteria | Zixibacteria     | MSB-5A5             |
| Yap-D113-6578_bin103 | 21.6 | 5.2 | 1.0 | 93  | Bacteria | Dependentiae     | Babeliae            |
| Yap-D113-6578_bin104 | 21.4 | 0.0 | 0.8 | 139 | Bacteria | Proteobacteria   | Gammaproteobacteria |
| Yap-D113-6578_bin105 | 21.0 | 0.0 | 0.6 | 109 | Bacteria | Chloroflexi      | Dehalococcoidia     |
| Yap-D113-6578_bin106 | 20.8 | 2.5 | 1.2 | 24  | Bacteria | Patescibacteria  | Paceibacteria       |
| Yap-D113-6578_bin107 | 20.5 | 0.0 | 0.7 | 125 | Bacteria | Chloroflexi      | Anaerolineae        |
| Yap-D113-6578_bin108 | 20.3 | 1.7 | 0.6 | 147 | Bacteria | Omnitrophica     | Omnitrophica        |
| Yap-D113-6578_bin109 | 19.8 | 0.0 | 0.8 | 123 | Bacteria | Proteobacteria   | Gammaproteobacteria |
| Yap-D113-6578_bin110 | 19.0 | 1.7 | 1.0 | 103 | Bacteria | Margulisbacteria | unclassified        |

|                      |      |     |     |     |          |                    |                     |
|----------------------|------|-----|-----|-----|----------|--------------------|---------------------|
| Yap-D113-6578_bin111 | 19.0 | 5.2 | 0.6 | 134 | Bacteria | Proteobacteria     | Gammaproteobacteria |
| Yap-D113-6578_bin112 | 18.5 | 1.7 | 0.8 | 99  | Bacteria | Chloroflexi        | Dehalococcoidia     |
| Yap-D113-6578_bin113 | 18.1 | 0.0 | 0.6 | 74  | Bacteria | Proteobacteria     | Gammaproteobacteria |
| Yap-D113-6578_bin114 | 17.9 | 6.7 | 0.5 | 68  | Bacteria | Patescibacteria    | Paceibacteria       |
| Yap-D113-6578_bin115 | 17.6 | 0.0 | 0.9 | 515 | Bacteria | Bacteroidetes      | Bacteroidia         |
| Yap-D113-6578_bin116 | 17.2 | 0.0 | 0.7 | 228 | Bacteria | Omnitrophica       | Omnitrophica        |
| Yap-D113-6578_bin117 | 17.1 | 0.0 | 0.6 | 100 | Bacteria | Nitrospinae        | unclassified        |
| Yap-D113-6578_bin118 | 17.1 | 6.9 | 0.7 | 265 | Bacteria | SM23-31            | SM23-31             |
| Yap-D113-6578_bin119 | 17.0 | 0.0 | 0.5 | 463 | Bacteria | unclassified       | unclassified        |
| Yap-D113-6578_bin120 | 17.0 | 0.0 | 0.7 | 115 | Bacteria | Nanoarchaeota      | unclassified        |
| Yap-D113-6578_bin121 | 16.5 | 0.0 | 0.9 | 100 | Bacteria | Proteobacteria     | Alphaproteobacteria |
| Yap-D113-6578_bin122 | 15.9 | 0.0 | 0.4 | 66  | Bacteria | Patescibacteria    | Paceibacteria       |
| Yap-D113-6578_bin123 | 15.8 | 0.2 | 0.4 | 654 | Bacteria | unclassified       | unclassified        |
| Yap-D113-6578_bin124 | 15.7 | 0.2 | 0.8 | 407 | Bacteria | Poribacteria       | unclassified        |
| Yap-D113-6578_bin125 | 15.7 | 1.7 | 1.1 | 229 | Bacteria | Proteobacteria     | Gammaproteobacteria |
| Yap-D113-6578_bin126 | 14.9 | 0.0 | 0.6 | 47  | Bacteria | Patescibacteria    | Paceibacteria       |
| Yap-D113-6578_bin127 | 14.9 | 0.0 | 0.8 | 202 | Bacteria | unclassified       | unclassified        |
| Yap-D113-6578_bin128 | 13.9 | 4.4 | 2.6 | 202 | Bacteria | Dadabacteria       | UBA1144             |
| Yap-D113-6578_bin129 | 13.8 | 0.0 | 0.9 | 29  | Bacteria | Dadabacteria       | UBA1144             |
| Yap-D113-6578_bin130 | 13.2 | 0.0 | 0.8 | 48  | Bacteria | Fibrobacteres      | unclassified        |
| Yap-D113-6578_bin131 | 12.9 | 0.9 | 5.2 | 70  | Bacteria | Bacteroidetes      | Ignavibacteria      |
| Yap-D113-6578_bin132 | 12.7 | 0.0 | 0.8 | 85  | Bacteria | unclassified       | unclassified        |
| Yap-D113-6578_bin133 | 12.5 | 0.0 | 1.6 | 88  | Bacteria | unclassified       | unclassified        |
| Yap-D113-6578_bin134 | 12.4 | 0.0 | 0.8 | 63  | Bacteria | Bdellovibrionaeota | unclassified        |
| Yap-D113-6578_bin135 | 12.1 | 0.0 | 0.8 | 75  | Bacteria | unclassified       | unclassified        |
| Yap-D113-6578_bin136 | 12.0 | 0.0 | 0.4 | 116 | Bacteria | unclassified       | unclassified        |



|                      |      |     |     |     |              |                 |                     |
|----------------------|------|-----|-----|-----|--------------|-----------------|---------------------|
| Yap-D113-6578_bin137 | 11.9 | 0.2 | 0.8 | 76  | Bacteria     | Proteobacteria  | Gammaproteobacteria |
| Yap-D113-6578_bin138 | 11.6 | 0.0 | 0.6 | 92  | Bacteria     | Chloroflexi     | Dehalococcoidia     |
| Yap-D113-6578_bin139 | 11.2 | 0.0 | 1.0 | 97  | Bacteria     | Proteobacteria  | Gammaproteobacteria |
| Yap-D113-6578_bin140 | 10.5 | 3.5 | 0.6 | 77  | Bacteria     | Planctomycetes  | Phycisphaerae       |
| Yap-D113-6578_bin141 | 10.3 | 0.5 | 0.6 | 387 | Bacteria     | Proteobacteria  | unclassified        |
| Yap-D113-6578_bin142 | 9.9  | 0.0 | 0.4 | 352 | Bacteria     | unclassified    | unclassified        |
| Yap-D113-6578_bin143 | 9.9  | 0.0 | 0.9 | 64  | Bacteria     | unclassified    | unclassified        |
| Yap-D113-6578_bin144 | 9.5  | 2.6 | 0.3 | 109 | Bacteria     | Omnitrophica    | koll11              |
| Yap-D113-6578_bin145 | 8.7  | 0.0 | 2.3 | 44  | Bacteria     | Bacteroidetes   | koll11              |
| Yap-D113-6578_bin146 | 8.6  | 0.1 | 0.5 | 106 | Bacteria     | unclassified    | unclassified        |
| Yap-D113-6578_bin147 | 8.0  | 0.0 | 0.6 | 35  | Bacteria     | Patescibacteria | Microgenomatia      |
| Yap-D113-6578_bin148 | 7.4  | 0.0 | 1.0 | 143 | Bacteria     | Nitrospirae     | Nitrospiria         |
| Yap-D113-6578_bin149 | 6.9  | 3.5 | 0.9 | 67  | Bacteria     | Chloroflexi     | Dehalococcoidia     |
| Yap-D113-6578_bin150 | 6.4  | 0.1 | 0.6 | 57  | Bacteria     | Elusimicrobia   | unclassified        |
| Yap-D113-6578_bin151 | 6.3  | 0.0 | 0.6 | 141 | Bacteria     | Actinobacteria  | unclassified        |
| Yap-D113-6578_bin152 | 5.6  | 1.8 | 1.3 | 114 | Bacteria     | Nitrospirae     | Nitrospiria         |
| Yap-D113-6578_bin153 | 4.2  | 0.0 | 0.7 | 33  | Bacteria     | Proteobacteria  | Gammaproteobacteria |
| Yap-D113-6578_bin154 | 4.2  | 4.2 | 1.0 | 319 | Bacteria     | Proteobacteria  | Gammaproteobacteria |
| Yap-D113-6578_bin155 | 3.9  | 0.1 | 0.6 | 151 | Bacteria     | Proteobacteria  | Gammaproteobacteria |
| Yap-D113-6578_bin156 | 2.7  | 0.0 | 1.3 | 50  | Bacteria     | Fibrobacteres   | unclassified        |
| Yap-D113-6578_bin157 | 1.8  | 0.0 | 0.9 | 52  | Bacteria     | UBA10199        | unclassified        |
| Yap-D113-6578_bin158 | 0.0  | 0.0 | 0.9 | 37  | Bacteria     | unclassified    | unclassified        |
| Yap-D113-6578_bin159 | 22.9 | 3.3 | 0.5 | 179 | unclassified | unclassified    | unclassified        |
| Yap-D113-6578_bin160 | 21.6 | 6.9 | 0.8 | 354 | unclassified | unclassified    | unclassified        |
| Yap-D113-6578_bin161 | 6.3  | 0.0 | 1.3 | 63  | unclassified | unclassified    | unclassified        |
| Yap-D113-6578_bin162 | 5.4  | 0.9 | 0.8 | 812 | unclassified | unclassified    | unclassified        |

|                      |      |      |      |     |          |                |                     |
|----------------------|------|------|------|-----|----------|----------------|---------------------|
| Yap-CTD02-5000_bin1  | 90.3 | 22.8 | 9.6  | 212 | Archaea  | Thaumarchaeota | Nitrososphaeria     |
| Yap-CTD02-5000_bin2  | 67.3 | 1.7  | 1.3  | 171 | Archaea  | Euryarchaeota  | Thermoplasmata      |
| Yap-CTD02-5000_bin3  | 61.2 | 1.9  | 0.9  | 77  | Archaea  | Thaumarchaeota | Nitrososphaeria     |
| Yap-CTD02-5000_bin4  | 59.4 | 0.0  | 1.4  | 34  | Archaea  | Nanoarchaeota  | Woearchaeia         |
| Yap-CTD02-5000_bin5  | 57.9 | 0.0  | 1.6  | 57  | Archaea  | Nanoarchaeota  | Woearchaeia         |
| Yap-CTD02-5000_bin6  | 41.4 | 0.0  | 0.7  | 79  | Archaea  | UBA543         | UBA543              |
| Yap-CTD02-5000_bin7  | 30.7 | 1.0  | 2.9  | 166 | Archaea  | Thaumarchaeota | Nitrososphaeria     |
| Yap-CTD02-5000_bin8  | 21.2 | 3.9  | 24.2 | 155 | Archaea  | Thaumarchaeota | Nitrososphaeria     |
| Yap-CTD02-5000_bin9  | 18.1 | 0.1  | 1.0  | 105 | Archaea  | Euryarchaeota  | Thermoplasmata      |
| Yap-CTD02-5000_bin10 | 14.5 | 0.0  | 0.8  | 122 | Archaea  | Euryarchaeota  | Thermoplasmata      |
| Yap-CTD02-5000_bin11 | 11.1 | 0.0  | 1.9  | 12  | Archaea  | Nanoarchaeota  | Woearchaeia         |
| Yap-CTD02-5000_bin12 | 9.4  | 0.0  | 0.8  | 72  | Archaea  | unclassified   | unclassified        |
| Yap-CTD02-5000_bin13 | 8.9  | 1.7  | 2.7  | 148 | Archaea  | Thaumarchaeota | Nitrososphaeria     |
| Yap-CTD02-5000_bin14 | 7.1  | 1.0  | 3.7  | 65  | Archaea  | Thaumarchaeota | Nitrososphaeria     |
| Yap-CTD02-5000_bin15 | 99.6 | 0.5  | 10.2 | 96  | Bacteria | Bacteroidetes  | Bacteroidia         |
| Yap-CTD02-5000_bin16 | 98.4 | 1.3  | 18.3 | 143 | Bacteria | Proteobacteria | Gammaproteobacteria |
| Yap-CTD02-5000_bin17 | 96.3 | 3.7  | 3.4  | 165 | Bacteria | Bacteroidetes  | Bacteroidia         |
| Yap-CTD02-5000_bin18 | 92.3 | 3.9  | 5.5  | 194 | Bacteria | Marinimicrobia | Marinisomatia       |
| Yap-CTD02-5000_bin19 | 91.7 | 45.5 | 1.7  | 811 | Bacteria | Proteobacteria | Gammaproteobacteria |
| Yap-CTD02-5000_bin20 | 91.5 | 0.2  | 43.3 | 71  | Bacteria | Proteobacteria | Gammaproteobacteria |
| Yap-CTD02-5000_bin21 | 87.3 | 23.5 | 1.1  | 394 | Bacteria | Planctomycetes | Phycisphaerae       |
| Yap-CTD02-5000_bin22 | 86.9 | 4.9  | 2.5  | 217 | Bacteria | Planctomycetes | Phycisphaerae       |
| Yap-CTD02-5000_bin23 | 81.9 | 0.8  | 1.3  | 212 | Bacteria | Firmicutes     | Bacilli             |
| Yap-CTD02-5000_bin24 | 80.0 | 8.8  | 4.8  | 875 | Bacteria | Proteobacteria | Gammaproteobacteria |
| Yap-CTD02-5000_bin25 | 75.8 | 2.2  | 3.6  | 351 | Bacteria | Marinimicrobia | Marinisomatia       |
| Yap-CTD02-5000_bin26 | 74.4 | 4.1  | 1.1  | 368 | Bacteria | Proteobacteria | Gammaproteobacteria |

|                      |      |      |      |     |          |                 |                     |
|----------------------|------|------|------|-----|----------|-----------------|---------------------|
| Yap-CTD02-5000_bin27 | 72.0 | 12.6 | 2.2  | 221 | Bacteria | Marinimicrobia  | Marinisomatia       |
| Yap-CTD02-5000_bin28 | 70.9 | 6.4  | 0.9  | 432 | Bacteria | Nitrospirae     | Nitrospiria         |
| Yap-CTD02-5000_bin29 | 69.6 | 1.1  | 7.0  | 358 | Bacteria | SAR324          | SAR324              |
| Yap-CTD02-5000_bin30 | 69.1 | 4.7  | 4.4  | 334 | Bacteria | Firmicutes      | Bacilli             |
| Yap-CTD02-5000_bin31 | 68.8 | 3.6  | 2.2  | 156 | Bacteria | Proteobacteria  | Gammaproteobacteria |
| Yap-CTD02-5000_bin32 | 68.2 | 5.5  | 0.9  | 351 | Bacteria | Dadabacteria    | UBA1144             |
| Yap-CTD02-5000_bin33 | 68.1 | 1.2  | 3.5  | 235 | Bacteria | Marinimicrobia  | Marinisomatia       |
| Yap-CTD02-5000_bin34 | 65.4 | 3.4  | 1.0  | 514 | Bacteria | Marinimicrobia  | Marinisomatia       |
| Yap-CTD02-5000_bin35 | 64.6 | 1.5  | 1.7  | 82  | Bacteria | Patescibacteria | Paceibacteria       |
| Yap-CTD02-5000_bin36 | 64.6 | 17.6 | 1.5  | 496 | Bacteria | Marinimicrobia  | Marinisomatia       |
| Yap-CTD02-5000_bin37 | 63.2 | 7.0  | 5.6  | 206 | Bacteria | Proteobacteria  | Gammaproteobacteria |
| Yap-CTD02-5000_bin38 | 54.8 | 5.2  | 0.7  | 302 | Bacteria | Planctomycetes  | Phycisphaerae       |
| Yap-CTD02-5000_bin39 | 48.7 | 11.1 | 0.8  | 75  | Bacteria | Patescibacteria | Paceibacteria       |
| Yap-CTD02-5000_bin40 | 47.5 | 0.0  | 0.9  | 893 | Bacteria | Firmicutes      | Bacilli             |
| Yap-CTD02-5000_bin41 | 44.8 | 1.7  | 0.9  | 493 | Bacteria | Proteobacteria  | Gammaproteobacteria |
| Yap-CTD02-5000_bin42 | 44.3 | 3.3  | 1.1  | 155 | Bacteria | Marinimicrobia  | Marinisomatia       |
| Yap-CTD02-5000_bin43 | 43.8 | 0.7  | 1.1  | 318 | Bacteria | Firmicutes      | Bacilli             |
| Yap-CTD02-5000_bin44 | 43.8 | 8.4  | 6.3  | 182 | Bacteria | Proteobacteria  | Alphaproteobacteria |
| Yap-CTD02-5000_bin45 | 43.0 | 8.4  | 1.0  | 508 | Bacteria | Chloroflexi     | Dehalococcoidia     |
| Yap-CTD02-5000_bin46 | 40.7 | 4.3  | 0.9  | 350 | Bacteria | SAR324          | SAR324              |
| Yap-CTD02-5000_bin47 | 39.7 | 0.0  | 1.1  | 387 | Bacteria | Proteobacteria  | Gammaproteobacteria |
| Yap-CTD02-5000_bin48 | 39.6 | 5.9  | 1.9  | 152 | Bacteria | Proteobacteria  | Gammaproteobacteria |
| Yap-CTD02-5000_bin49 | 36.2 | 0.0  | 0.7  | 637 | Bacteria | Proteobacteria  | Gammaproteobacteria |
| Yap-CTD02-5000_bin50 | 35.3 | 5.7  | 0.9  | 179 | Bacteria | Proteobacteria  | Alphaproteobacteria |
| Yap-CTD02-5000_bin51 | 35.0 | 2.0  | 0.8  | 274 | Bacteria | Chloroflexi     | Dehalococcoidia     |
| Yap-CTD02-5000_bin52 | 34.5 | 4.4  | 11.7 | 295 | Bacteria | Proteobacteria  | Alphaproteobacteria |

|                      |      |     |      |       |              |                 |                     |
|----------------------|------|-----|------|-------|--------------|-----------------|---------------------|
| Yap-CTD02-5000_bin53 | 34.3 | 4.3 | 0.7  | 128   | Bacteria     | Dadabacteria    | UBA1144             |
| Yap-CTD02-5000_bin54 | 22.7 | 0.0 | 0.8  | 405   | Bacteria     | Proteobacteria  | Gammaproteobacteria |
| Yap-CTD02-5000_bin55 | 22.3 | 0.0 | 0.6  | 164   | Bacteria     | Planctomycetes  | Phycisphaerae       |
| Yap-CTD02-5000_bin56 | 19.1 | 0.4 | 0.7  | 364   | Bacteria     | Proteobacteria  | Gammaproteobacteria |
| Yap-CTD02-5000_bin57 | 17.9 | 0.1 | 51.0 | 126   | Bacteria     | Proteobacteria  | Gammaproteobacteria |
| Yap-CTD02-5000_bin58 | 17.2 | 1.7 | 0.7  | 312   | Bacteria     | Bacteroidetes   | Bacteroidia         |
| Yap-CTD02-5000_bin59 | 16.8 | 0.1 | 36.8 | 90    | Bacteria     | Marinimicrobia  | Marinisomatia       |
| Yap-CTD02-5000_bin60 | 16.2 | 1.2 | 0.8  | 170   | Bacteria     | Proteobacteria  | Gammaproteobacteria |
| Yap-CTD02-5000_bin61 | 16.0 | 0.0 | 0.7  | 251   | Bacteria     | Proteobacteria  | Gammaproteobacteria |
| Yap-CTD02-5000_bin62 | 15.8 | 0.0 | 1.1  | 85    | Bacteria     | Proteobacteria  | Gammaproteobacteria |
| Yap-CTD02-5000_bin63 | 15.7 | 0.3 | 0.7  | 368   | Bacteria     | Chloroflexi     | Dehalococcoidia     |
| Yap-CTD02-5000_bin64 | 15.5 | 0.0 | 1.7  | 218   | Bacteria     | Proteobacteria  | Gammaproteobacteria |
| Yap-CTD02-5000_bin65 | 12.8 | 3.5 | 1.0  | 113   | Bacteria     | Planctomycetes  | Phycisphaerae       |
| Yap-CTD02-5000_bin66 | 12.7 | 0.0 | 0.6  | 47    | Bacteria     | Patescibacteria | Paceibacteria       |
| Yap-CTD02-5000_bin67 | 10.8 | 0.0 | 1.8  | 100   | Bacteria     | Bacteroidetes   | Bacteroidia         |
| Yap-CTD02-5000_bin68 | 10.3 | 0.0 | 0.8  | 52    | Bacteria     | Bacteroidetes   | Bacteroidia         |
| Yap-CTD02-5000_bin69 | 10.3 | 1.7 | 1.8  | 40    | Bacteria     | Bacteroidetes   | Bacteroidia         |
| Yap-CTD02-5000_bin70 | 7.8  | 0.0 | 2.6  | 58    | Bacteria     | Proteobacteria  | Alphaproteobacteria |
| Yap-CTD02-5000_bin71 | 5.5  | 0.0 | 0.9  | 101   | Bacteria     | Marinimicrobia  | Gammaproteobacteria |
| Yap-CTD02-5000_bin72 | 5.3  | 0.0 | 1.1  | 327   | Bacteria     | Verrucomicrobia | Verrucomicrobiae    |
| Yap-CTD02-5000_bin73 | 4.2  | 0.0 | 0.7  | 90    | Bacteria     | Marinimicrobia  | Marinisomatia       |
| Yap-CTD02-5000_bin74 | 3.7  | 0.0 | 1.2  | 1817  | Bacteria     | Proteobacteria  | Gammaproteobacteria |
| Yap-CTD02-5000_bin75 | 2.1  | 0.0 | 2.0  | 299   | Bacteria     | Proteobacteria  | Gammaproteobacteria |
| Yap-CTD02-5000_bin76 | 1.3  | 0.0 | 0.7  | 18    | Bacteria     | Chloroflexi     | Dehalococcoidia     |
| Yap-CTD02-5000_bin77 | 9.8  | 0.0 | 1.9  | 357   | unclassified | unclassified    | unclassified        |
| Yap-CTD02-5000_bin78 | 8.9  | 0.2 | 0.6  | 22829 | unclassified | unclassified    | unclassified        |

|                      |      |      |      |     |              |                |                     |
|----------------------|------|------|------|-----|--------------|----------------|---------------------|
| Yap-CTD02-5000_bin79 | 2.9  | 0.0  | 2.7  | 69  | unclassified | unclassified   | unclassified        |
| Yap-CTD03-5700_bin1  | 97.8 | 26.1 | 3.5  | 187 | Archaea      | Thaumarchaeota | Nitrososphaeria     |
| Yap-CTD03-5700_bin2  | 66.4 | 0.0  | 1.1  | 244 | Archaea      | Euryarchaeota  | Thermoplasmata      |
| Yap-CTD03-5700_bin3  | 30.4 | 0.0  | 0.6  | 181 | Archaea      | Euryarchaeota  | Thermoplasmata      |
| Yap-CTD03-5700_bin4  | 21.4 | 0.0  | 9.5  | 71  | Archaea      | Thaumarchaeota | Nitrososphaeria     |
| Yap-CTD03-5700_bin5  | 13.5 | 0.0  | 0.6  | 167 | Archaea      | Euryarchaeota  | Thermoplasmata      |
| Yap-CTD03-5700_bin6  | 12.6 | 0.9  | 1.1  | 47  | Archaea      | Euryarchaeota  | Thermoplasmata      |
| Yap-CTD03-5700_bin7  | 99.3 | 3.0  | 3.1  | 26  | Bacteria     | Bacteroidetes  | Bacteroidia         |
| Yap-CTD03-5700_bin8  | 98.8 | 0.7  | 14.5 | 125 | Bacteria     | Proteobacteria | Gammaproteobacteria |
| Yap-CTD03-5700_bin9  | 98.5 | 6.8  | 16.0 | 51  | Bacteria     | Proteobacteria | Gammaproteobacteria |
| Yap-CTD03-5700_bin10 | 98.5 | 1.2  | 1.6  | 70  | Bacteria     | Proteobacteria | Gammaproteobacteria |
| Yap-CTD03-5700_bin11 | 98.4 | 0.1  | 1.5  | 67  | Bacteria     | Proteobacteria | Gammaproteobacteria |
| Yap-CTD03-5700_bin12 | 98.2 | 0.4  | 2.4  | 53  | Bacteria     | Proteobacteria | Alphaproteobacteria |
| Yap-CTD03-5700_bin13 | 97.2 | 1.9  | 2.2  | 370 | Bacteria     | Proteobacteria | Gammaproteobacteria |
| Yap-CTD03-5700_bin14 | 97.0 | 3.0  | 3.8  | 66  | Bacteria     | Proteobacteria | Gammaproteobacteria |
| Yap-CTD03-5700_bin15 | 96.8 | 0.2  | 2.2  | 71  | Bacteria     | Proteobacteria | Alphaproteobacteria |
| Yap-CTD03-5700_bin16 | 96.6 | 0.4  | 1.8  | 44  | Bacteria     | Bacteroidetes  | Bacteroidia         |
| Yap-CTD03-5700_bin17 | 95.6 | 0.2  | 16.8 | 53  | Bacteria     | Proteobacteria | Gammaproteobacteria |
| Yap-CTD03-5700_bin18 | 92.6 | 3.6  | 2.3  | 451 | Bacteria     | Proteobacteria | Gammaproteobacteria |
| Yap-CTD03-5700_bin19 | 91.8 | 6.6  | 1.8  | 238 | Bacteria     | Marinimicrobia | Marinisomatia       |
| Yap-CTD03-5700_bin20 | 89.3 | 2.0  | 2.3  | 362 | Bacteria     | SAR324         | SAR324              |
| Yap-CTD03-5700_bin21 | 87.2 | 18.4 | 4.4  | 663 | Bacteria     | Proteobacteria | Gammaproteobacteria |
| Yap-CTD03-5700_bin22 | 83.0 | 3.4  | 1.4  | 135 | Bacteria     | Proteobacteria | Gammaproteobacteria |
| Yap-CTD03-5700_bin23 | 81.3 | 2.3  | 2.0  | 251 | Bacteria     | Planctomycetes | Phycisphaerae       |
| Yap-CTD03-5700_bin24 | 79.4 | 4.3  | 0.9  | 698 | Bacteria     | Nitrospirae    | Nitrospira          |
| Yap-CTD03-5700_bin25 | 78.6 | 19.6 | 1.8  | 340 | Bacteria     | Proteobacteria | Gammaproteobacteria |

|                      |      |      |      |     |          |                 |                     |
|----------------------|------|------|------|-----|----------|-----------------|---------------------|
| Yap-CTD03-5700_bin26 | 75.8 | 0.8  | 0.8  | 302 | Bacteria | Proteobacteria  | Gammaproteobacteria |
| Yap-CTD03-5700_bin27 | 73.1 | 2.2  | 1.2  | 385 | Bacteria | Marinimicrobia  | Marinisomatia       |
| Yap-CTD03-5700_bin28 | 71.0 | 0.0  | 1.6  | 259 | Bacteria | Marinimicrobia  | Marinisomatia       |
| Yap-CTD03-5700_bin29 | 65.4 | 4.0  | 0.9  | 216 | Bacteria | Planctomycetes  | Phycisphaerae       |
| Yap-CTD03-5700_bin30 | 63.2 | 2.6  | 5.2  | 285 | Bacteria | Firmicutes      | Bacilli             |
| Yap-CTD03-5700_bin31 | 61.8 | 0.8  | 1.0  | 448 | Bacteria | Proteobacteria  | Gammaproteobacteria |
| Yap-CTD03-5700_bin32 | 58.7 | 5.2  | 2.1  | 314 | Bacteria | Proteobacteria  | Gammaproteobacteria |
| Yap-CTD03-5700_bin33 | 58.5 | 1.3  | 0.8  | 85  | Bacteria | Patescibacteria | Paceibacteria       |
| Yap-CTD03-5700_bin34 | 58.4 | 6.6  | 1.8  | 177 | Bacteria | Proteobacteria  | Alphaproteobacteria |
| Yap-CTD03-5700_bin35 | 57.6 | 4.5  | 14.7 | 447 | Bacteria | Marinimicrobia  | Marinisomatia       |
| Yap-CTD03-5700_bin36 | 57.5 | 15.8 | 0.7  | 663 | Bacteria | Bacteroidetes   | Bacteroidia         |
| Yap-CTD03-5700_bin37 | 57.5 | 3.1  | 2.5  | 201 | Bacteria | Proteobacteria  | Gammaproteobacteria |
| Yap-CTD03-5700_bin38 | 54.4 | 10.4 | 0.9  | 197 | Bacteria | Bacteroidetes   | Bacteroidia         |
| Yap-CTD03-5700_bin39 | 53.5 | 6.1  | 0.7  | 377 | Bacteria | Marinimicrobia  | Marinisomatia       |
| Yap-CTD03-5700_bin40 | 51.9 | 2.3  | 0.7  | 336 | Bacteria | Bacteroidetes   | Bacteroidia         |
| Yap-CTD03-5700_bin41 | 50.9 | 12.5 | 7.4  | 708 | Bacteria | Proteobacteria  | Gammaproteobacteria |
| Yap-CTD03-5700_bin42 | 48.1 | 2.7  | 0.7  | 178 | Bacteria | Planctomycetes  | Phycisphaerae       |
| Yap-CTD03-5700_bin43 | 47.6 | 8.6  | 9.0  | 13  | Bacteria | Proteobacteria  | Gammaproteobacteria |
| Yap-CTD03-5700_bin44 | 46.9 | 1.4  | 0.8  | 273 | Bacteria | Proteobacteria  | Gammaproteobacteria |
| Yap-CTD03-5700_bin45 | 44.0 | 1.7  | 0.9  | 295 | Bacteria | Firmicutes      | Bacilli             |
| Yap-CTD03-5700_bin46 | 40.6 | 6.9  | 1.0  | 536 | Bacteria | Proteobacteria  | Gammaproteobacteria |
| Yap-CTD03-5700_bin47 | 38.8 | 1.7  | 0.9  | 365 | Bacteria | Proteobacteria  | Alphaproteobacteria |
| Yap-CTD03-5700_bin48 | 38.6 | 1.3  | 0.6  | 455 | Bacteria | Firmicutes      | Bacilli             |
| Yap-CTD03-5700_bin49 | 36.2 | 0.0  | 0.6  | 600 | Bacteria | Bacteroidetes   | Bacteroidia         |
| Yap-CTD03-5700_bin50 | 35.4 | 0.2  | 3.8  | 238 | Bacteria | Marinimicrobia  | Marinisomatia       |
| Yap-CTD03-5700_bin51 | 34.8 | 1.7  | 0.9  | 428 | Bacteria | Proteobacteria  | Gammaproteobacteria |

|                      |      |     |     |     |          |                 |                     |
|----------------------|------|-----|-----|-----|----------|-----------------|---------------------|
| Yap-CTD03-5700_bin52 | 34.3 | 1.1 | 0.8 | 138 | Bacteria | Planctomycetes  | Phycisphaerae       |
| Yap-CTD03-5700_bin53 | 34.1 | 1.7 | 9.3 | 67  | Bacteria | Proteobacteria  | Gammaproteobacteria |
| Yap-CTD03-5700_bin54 | 32.8 | 0.0 | 0.9 | 479 | Bacteria | Proteobacteria  | Gammaproteobacteria |
| Yap-CTD03-5700_bin55 | 31.5 | 1.7 | 0.7 | 156 | Bacteria | Marinimicrobia  | Marinisomatia       |
| Yap-CTD03-5700_bin56 | 31.3 | 0.0 | 0.9 | 236 | Bacteria | Proteobacteria  | Gammaproteobacteria |
| Yap-CTD03-5700_bin57 | 30.1 | 3.5 | 0.5 | 554 | Bacteria | Chloroflexi     | Dehalococcoidia     |
| Yap-CTD03-5700_bin58 | 29.3 | 0.0 | 0.8 | 140 | Bacteria | Bacteroidetes   | Bacteroidia         |
| Yap-CTD03-5700_bin59 | 29.2 | 0.0 | 0.7 | 299 | Bacteria | Proteobacteria  | Alphaproteobacteria |
| Yap-CTD03-5700_bin60 | 27.7 | 0.0 | 0.7 | 480 | Bacteria | Bacteroidetes   | Bacteroidia         |
| Yap-CTD03-5700_bin61 | 25.9 | 5.2 | 1.1 | 77  | Bacteria | Planctomycetes  | Phycisphaerae       |
| Yap-CTD03-5700_bin62 | 23.2 | 0.5 | 0.7 | 249 | Bacteria | Proteobacteria  | Gammaproteobacteria |
| Yap-CTD03-5700_bin63 | 23.2 | 1.7 | 0.6 | 104 | Bacteria | Acidobacteria   | unclassified        |
| Yap-CTD03-5700_bin64 | 20.2 | 0.0 | 7.0 | 250 | Bacteria | Proteobacteria  | Gammaproteobacteria |
| Yap-CTD03-5700_bin65 | 19.6 | 0.0 | 0.6 | 263 | Bacteria | Proteobacteria  | Gammaproteobacteria |
| Yap-CTD03-5700_bin66 | 17.9 | 0.0 | 4.0 | 79  | Bacteria | Proteobacteria  | Alphaproteobacteria |
| Yap-CTD03-5700_bin67 | 15.6 | 0.0 | 1.1 | 107 | Bacteria | Proteobacteria  | Gammaproteobacteria |
| Yap-CTD03-5700_bin68 | 15.6 | 0.7 | 0.6 | 139 | Bacteria | Verrucomicrobia | Verrucomicrobiae    |
| Yap-CTD03-5700_bin69 | 13.8 | 0.0 | 1.4 | 109 | Bacteria | Proteobacteria  | Gammaproteobacteria |
| Yap-CTD03-5700_bin70 | 12.1 | 0.0 | 7.1 | 149 | Bacteria | Firmicutes      | Bacilli             |
| Yap-CTD03-5700_bin71 | 11.8 | 0.9 | 1.7 | 102 | Bacteria | Proteobacteria  | Gammaproteobacteria |
| Yap-CTD03-5700_bin72 | 11.7 | 0.0 | 0.7 | 177 | Bacteria | Planctomycetes  | Phycisphaerae       |
| Yap-CTD03-5700_bin73 | 11.6 | 0.0 | 0.6 | 62  | Bacteria | Proteobacteria  | Alphaproteobacteria |
| Yap-CTD03-5700_bin74 | 10.0 | 0.0 | 0.5 | 305 | Bacteria | Chloroflexi     | Dehalococcoidia     |
| Yap-CTD03-5700_bin75 | 9.4  | 0.7 | 0.4 | 58  | Bacteria | Planctomycetes  | Phycisphaerae       |
| Yap-CTD03-5700_bin76 | 8.8  | 0.0 | 1.4 | 104 | Bacteria | Marinimicrobia  | Marinisomatia       |
| Yap-CTD02-6000_bin1  | 47.3 | 0.0 | 0.7 | 51  | Archaea  | Nanoarchaeota   | Woesearchaeia       |

|                      |       |      |      |      |          |                |                     |
|----------------------|-------|------|------|------|----------|----------------|---------------------|
| Yap-CTD02-6000_bin2  | 44.6  | 2.4  | 5.5  | 109  | Archaea  | Thaumarchaeota | Nitrososphaeria     |
| Yap-CTD02-6000_bin3  | 35.3  | 0.0  | 0.6  | 62   | Archaea  | Nanoarchaeota  | Woearchaeia         |
| Yap-CTD02-6000_bin4  | 32.9  | 0.0  | 0.6  | 236  | Archaea  | Euryarchaeota  | Thermoplasmata      |
| Yap-CTD02-6000_bin5  | 29.8  | 1.2  | 5.8  | 68   | Archaea  | Thaumarchaeota | Nitrososphaeria     |
| Yap-CTD02-6000_bin6  | 27.3  | 1.0  | 8.2  | 66   | Archaea  | Thaumarchaeota | Nitrososphaeria     |
| Yap-CTD02-6000_bin7  | 17.3  | 1.9  | 11.6 | 73   | Archaea  | Thaumarchaeota | Nitrososphaeria     |
| Yap-CTD02-6000_bin8  | 5.3   | 0.0  | 3.7  | 14   | Archaea  | Thaumarchaeota | Nitrososphaeria     |
| Yap-CTD02-6000_bin9  | 100.0 | 0.0  | 9.6  | 34   | Bacteria | Proteobacteria | Gammaproteobacteria |
| Yap-CTD02-6000_bin10 | 100.0 | 0.2  | 11.5 | 54   | Bacteria | Proteobacteria | Gammaproteobacteria |
| Yap-CTD02-6000_bin11 | 99.9  | 0.9  | 2.3  | 34   | Bacteria | Proteobacteria | Gammaproteobacteria |
| Yap-CTD02-6000_bin12 | 98.7  | 1.6  | 10.4 | 88   | Bacteria | Proteobacteria | Gammaproteobacteria |
| Yap-CTD02-6000_bin13 | 97.3  | 11.8 | 4.0  | 629  | Bacteria | Proteobacteria | Gammaproteobacteria |
| Yap-CTD02-6000_bin14 | 97.0  | 4.3  | 46.5 | 200  | Bacteria | Proteobacteria | Gammaproteobacteria |
| Yap-CTD02-6000_bin15 | 95.3  | 3.5  | 2.4  | 108  | Bacteria | Bacteroidetes  | Bacteroidia         |
| Yap-CTD02-6000_bin16 | 94.7  | 1.7  | 1.8  | 181  | Bacteria | Proteobacteria | Gammaproteobacteria |
| Yap-CTD02-6000_bin17 | 92.9  | 5.4  | 3.1  | 448  | Bacteria | Proteobacteria | Gammaproteobacteria |
| Yap-CTD02-6000_bin18 | 92.0  | 21.9 | 3.8  | 536  | Bacteria | Proteobacteria | Gammaproteobacteria |
| Yap-CTD02-6000_bin19 | 89.8  | 2.9  | 1.5  | 225  | Bacteria | Planctomycetes | Phycisphaerae       |
| Yap-CTD02-6000_bin20 | 86.8  | 1.1  | 1.2  | 281  | Bacteria | SAR324         | SAR324              |
| Yap-CTD02-6000_bin21 | 83.8  | 1.7  | 1.6  | 152  | Bacteria | Marinimicrobia | Marinisomatia       |
| Yap-CTD02-6000_bin22 | 81.2  | 2.0  | 2.0  | 71   | Bacteria | Proteobacteria | Gammaproteobacteria |
| Yap-CTD02-6000_bin23 | 81.1  | 8.5  | 2.9  | 1053 | Bacteria | Proteobacteria | Gammaproteobacteria |
| Yap-CTD02-6000_bin24 | 78.6  | 2.3  | 1.3  | 243  | Bacteria | Marinimicrobia | Marinisomatia       |
| Yap-CTD02-6000_bin25 | 75.8  | 10.1 | 0.7  | 619  | Bacteria | Dadabacteria   | UBA1144             |
| Yap-CTD02-6000_bin26 | 70.6  | 3.9  | 0.8  | 479  | Bacteria | Marinimicrobia | Marinisomatia       |
| Yap-CTD02-6000_bin27 | 69.0  | 0.0  | 0.8  | 669  | Bacteria | Proteobacteria | Gammaproteobacteria |



|                      |      |      |       |     |          |                 |                     |
|----------------------|------|------|-------|-----|----------|-----------------|---------------------|
| Yap-CTD02-6000_bin28 | 67.0 | 0.0  | 0.8   | 353 | Bacteria | Bacteroidetes   | Bacteroidia         |
| Yap-CTD02-6000_bin29 | 66.0 | 8.1  | 10.7  | 357 | Bacteria | Marinimicrobia  | Marinisomatia       |
| Yap-CTD02-6000_bin30 | 64.8 | 27.9 | 0.7   | 747 | Bacteria | Proteobacteria  | unclassified        |
| Yap-CTD02-6000_bin31 | 63.7 | 2.5  | 1.1   | 96  | Bacteria | Patescibacteria | Paceibacteria       |
| Yap-CTD02-6000_bin32 | 63.5 | 1.7  | 3.9   | 256 | Bacteria | Proteobacteria  | Gammaproteobacteria |
| Yap-CTD02-6000_bin33 | 61.9 | 0.4  | 1.7   | 359 | Bacteria | Proteobacteria  | Gammaproteobacteria |
| Yap-CTD02-6000_bin34 | 61.4 | 4.3  | 1.1   | 274 | Bacteria | Proteobacteria  | Gammaproteobacteria |
| Yap-CTD02-6000_bin35 | 59.6 | 2.0  | 4.1   | 311 | Bacteria | Firmicutes      | Bacilli             |
| Yap-CTD02-6000_bin36 | 58.2 | 3.5  | 0.7   | 397 | Bacteria | Bacteroidetes   | Bacteroidia         |
| Yap-CTD02-6000_bin37 | 47.2 | 4.4  | 0.6   | 419 | Bacteria | Planctomycetes  | Phycisphaerae       |
| Yap-CTD02-6000_bin38 | 47.0 | 1.7  | 166.3 | 604 | Bacteria | Proteobacteria  | Gammaproteobacteria |
| Yap-CTD02-6000_bin39 | 44.8 | 2.1  | 0.7   | 393 | Bacteria | Proteobacteria  | Alphaproteobacteria |
| Yap-CTD02-6000_bin40 | 44.0 | 3.6  | 3.8   | 189 | Bacteria | Proteobacteria  | Alphaproteobacteria |
| Yap-CTD02-6000_bin41 | 42.6 | 2.9  | 1.1   | 193 | Bacteria | Proteobacteria  | Gammaproteobacteria |
| Yap-CTD02-6000_bin42 | 37.1 | 4.3  | 0.8   | 223 | Bacteria | Acidobacteria   | unclassified        |
| Yap-CTD02-6000_bin43 | 35.4 | 4.2  | 1.1   | 215 | Bacteria | Bacteroidetes   | Bacteroidia         |
| Yap-CTD02-6000_bin44 | 33.6 | 0.5  | 0.7   | 231 | Bacteria | Proteobacteria  | Gammaproteobacteria |
| Yap-CTD02-6000_bin45 | 31.7 | 2.2  | 0.6   | 173 | Bacteria | Marinimicrobia  | Marinisomatia       |
| Yap-CTD02-6000_bin46 | 31.0 | 6.9  | 2.1   | 228 | Bacteria | Firmicutes      | Bacilli             |
| Yap-CTD02-6000_bin47 | 30.5 | 7.7  | 4.3   | 378 | Bacteria | Marinimicrobia  | Marinisomatia       |
| Yap-CTD02-6000_bin48 | 29.5 | 0.0  | 0.5   | 84  | Bacteria | Proteobacteria  | Gammaproteobacteria |
| Yap-CTD02-6000_bin49 | 28.1 | 0.0  | 0.5   | 160 | Bacteria | Planctomycetes  | Phycisphaerae       |
| Yap-CTD02-6000_bin50 | 26.7 | 0.0  | 0.5   | 211 | Bacteria | Proteobacteria  | Gammaproteobacteria |
| Yap-CTD02-6000_bin51 | 25.9 | 1.9  | 0.5   | 229 | Bacteria | Proteobacteria  | Alphaproteobacteria |
| Yap-CTD02-6000_bin52 | 25.5 | 5.0  | 0.7   | 318 | Bacteria | Proteobacteria  | Gammaproteobacteria |
| Yap-CTD02-6000_bin53 | 25.0 | 0.0  | 0.5   | 213 | Bacteria | Bacteroidetes   | Bacteroidia         |

|                      |      |      |     |     |          |                |                     |
|----------------------|------|------|-----|-----|----------|----------------|---------------------|
| Yap-CTD02-6000_bin54 | 23.0 | 6.0  | 2.1 | 70  | Bacteria | Proteobacteria | Alphaproteobacteria |
| Yap-CTD02-6000_bin55 | 22.9 | 0.0  | 0.6 | 392 | Bacteria | Nitrospirae    | Nitrospiria         |
| Yap-CTD02-6000_bin56 | 21.8 | 0.0  | 1.7 | 251 | Bacteria | Proteobacteria | Gammaproteobacteria |
| Yap-CTD02-6000_bin57 | 20.7 | 0.0  | 0.5 | 374 | Bacteria | Bacteroidetes  | Bacteroidia         |
| Yap-CTD02-6000_bin58 | 20.7 | 10.5 | 2.8 | 26  | Bacteria | Proteobacteria | Gammaproteobacteria |
| Yap-CTD02-6000_bin59 | 17.4 | 0.0  | 5.4 | 162 | Bacteria | Proteobacteria | Alphaproteobacteria |
| Yap-CTD02-6000_bin60 | 17.2 | 0.0  | 1.5 | 38  | Bacteria | Proteobacteria | Gammaproteobacteria |
| Yap-CTD02-6000_bin61 | 16.0 | 0.0  | 1.7 | 127 | Bacteria | Proteobacteria | Gammaproteobacteria |
| Yap-CTD02-6000_bin62 | 15.3 | 0.9  | 0.7 | 332 | Bacteria | Proteobacteria | Alphaproteobacteria |
| Yap-CTD02-6000_bin63 | 15.2 | 0.0  | 0.9 | 208 | Bacteria | Bacteroidetes  | Bacteroidia         |
| Yap-CTD02-6000_bin64 | 14.7 | 0.0  | 0.4 | 311 | Bacteria | Firmicutes     | Bacilli             |
| Yap-CTD02-6000_bin65 | 14.3 | 1.9  | 2.3 | 156 | Bacteria | Proteobacteria | Alphaproteobacteria |
| Yap-CTD02-6000_bin66 | 12.5 | 5.2  | 2.4 | 79  | Bacteria | Marinimicrobia | Marinisomatia       |
| Yap-CTD02-6000_bin67 | 11.2 | 0.0  | 0.5 | 358 | Bacteria | Thaumarchaeota | Nitrososphaeria     |
| Yap-CTD02-6000_bin68 | 6.5  | 0.0  | 0.5 | 188 | Bacteria | Proteobacteria | Alphaproteobacteria |
| Yap-CTD02-6000_bin69 | 4.2  | 0.0  | 9.4 | 49  | Bacteria | Marinimicrobia | Marinisomatia       |
| Yap-CTD02-6000_bin70 | 4.2  | 0.0  | 1.6 | 95  | Bacteria | Bacteroidetes  | Bacteroidia         |
| Yap-CTD02-6000_bin71 | 1.4  | 0.0  | 0.5 | 71  | Bacteria | Proteobacteria | Alphaproteobacteria |
| Yap-CTD02-6000_bin72 | 1.0  | 0.0  | 0.7 | 552 | Bacteria | Bacteroidetes  | Bacteroidia         |
